# Supplementary material
Source: PubMed Central journal article supplement (PMC8456301)

## Early life exposure to environmental contaminants (BDE-47, TBBPA, and BPS) produced persistent alterations in fecal microbiome in adult male mice

<sup>1</sup>Matthew V. Gomez, <sup>1</sup>Moumita Dutta, <sup>2</sup>Alexander Suvorov, <sup>1</sup>Xiaojian Shi, <sup>3</sup>Haiwei Gu, <sup>4</sup>Alex Eng, <sup>4</sup>Elhanan Borenstein, <sup>5</sup>Sridhar Mani, and <sup>1</sup>Julia Yue Cui

### Supplemental Figure Legends

**Figure S1.** Composition and diversity of CD-1 mice that were maternally exposed to vehicle vs. mice that were not maternally exposed to vehicle or any other chemicals (NT). **A)** Alpha diversity of NT and vehicle-exposed groups via chao1 index (asterisks represent statistically significant differences between NT and vehicle-exposed groups). **B)** Beta diversity of NT and vehicle-exposed groups. **C)** Composition of bacteria (L7) in NT and vehicle-exposed groups. The top 15 most abundant taxa are shown (the remaining taxa are summed and shown in the “Other” category). Asterisks represent statically significant changes as compared to NT group (Student’s t-test,  $p < 0.05$ ).

**Figure S2.** Microbial biomarkers associated with each exposure group using Lefse.

**Figure S3.** Two-way hierarchical clustering dendrograms showing differentially regulated taxa by early life vehicle-exposure as compared to NT.

**Figure S4.** Pearson’s correlation analyses between differentially regulated taxa and BAs **(A)** and short/medium chain fatty acids **(B)**.

**Figure S5-S15.** Individual microbial pathways predicted by Fishtaco in vehicle- and BDE-47 exposure groups.

**Figure S16-S39.** Individual microbial pathways predicted by Fishtaco in vehicle- and TBBPA exposure groups.

## Supplemental Tables

| <b>Supplemental Table 1. Joined reads per sample (16S rDNA Sequencing)</b> |                        |
|----------------------------------------------------------------------------|------------------------|
| <b>Sample Name</b>                                                         | <b>Number of Reads</b> |
| No Treatment 1                                                             | 112,745                |
| No Treatment 2                                                             | 145,071                |
| No Treatment 3                                                             | 139,687                |
| No Treatment 4                                                             | 88,144                 |
| No Treatment 5                                                             | 135,336                |
| No Treatment 6                                                             | 206,800                |
| No Treatment 7                                                             | 201,923                |
| No Treatment 8                                                             | 199,547                |
| No Treatment 9                                                             | 182,291                |
| No Treatment 10                                                            | 152,520                |
| No Treatment 11                                                            | 121,927                |
| No Treatment 12                                                            | 157,246                |
| No Treatment 13                                                            | 173,285                |
| No Treatment 14                                                            | 157,325                |
| No Treatment 15                                                            | 146,591                |
| No Treatment 16                                                            | 97,279                 |
| No Treatment 17                                                            | 202,013                |
| No Treatment 18                                                            | 197,967                |
| No Treatment 19                                                            | 201,732                |
| Vehicle 1                                                                  | 212,663                |
| Vehicle 2                                                                  | 192,999                |
| Vehicle 3                                                                  | 157,380                |
| Vehicle 4                                                                  | 118,261                |
| Vehicle 5                                                                  | 148,384                |
| Vehicle 6                                                                  | 176,899                |
| Vehicle 7                                                                  | 165,180                |
| Vehicle 8                                                                  | 165,363                |
| Vehicle 9                                                                  | 107,253                |
| Vehicle 10                                                                 | 204,988                |
| Vehicle 11                                                                 | 210,909                |
| Vehicle 12                                                                 | 200,861                |
| Vehicle 13                                                                 | 202,090                |
| Vehicle 14                                                                 | 145,106                |
| Vehicle 15                                                                 | 129,645                |
| Vehicle 16                                                                 | 104,676                |
| Vehicle 17                                                                 | 121,548                |
| Vehicle 18                                                                 | 137,707                |
| BDE47 -1                                                                   | 146,132                |
| BDE47 -2                                                                   | 132,719                |
| BDE47 -3                                                                   | 81,039                 |
| BDE47 -4                                                                   | 162,219                |
| BDE-5                                                                      | N/A                    |
| BDE47 -6                                                                   | 3,682                  |
| BDE47 -7                                                                   | 213,768                |
| BDE47 -8                                                                   | 211,818                |
| BDE47 -9                                                                   | 181,340                |
| BDE47 -10                                                                  | 121,229                |
| BDE47 -11                                                                  | 126,654                |

|           |         |
|-----------|---------|
| BDE47 -12 | 164,619 |
| BDE47 -13 | 144,856 |
| BDE47 -14 | 169,764 |
| BDE47 -15 | 129,872 |
| BDE47 -16 | 105,679 |
| BDE47 -17 | 177,815 |
| BDE47 -18 | 209,106 |
| BDE47 -19 | 214,197 |
| BDE47 -20 | 196,158 |
| BDE47 -21 | 198,859 |
| BDE47 -22 | 204,357 |
| BDE47 -23 | 200,738 |
| BDE47 -24 | 213,415 |
| TBBPA 1   | 201,625 |
| TBBPA 2   | 202,847 |
| TBBPA 3   | 203,431 |
| TBBPA 4   | 201,085 |
| TBBPA 5   | 50,977  |
| TBBPA 6   | 205,831 |
| TBBPA 7   | 3,734   |
| TBBPA 8   | 136,343 |
| TBBPA 9   | 201,831 |
| TBBPA 10  | 165,147 |
| TBBPA 11  | 177,554 |
| TBBPA 12  | 210,776 |
| TBBPA 13  | 195,559 |
| TBBPA 14  | 201,791 |
| TBBPA 15  | 186,937 |
| TBBPA 16  | 141,132 |
| TBBPA 17  | 211,239 |
| BPS 1     | 212,935 |
| BPS 2     | 203,707 |
| BPS 3     | 207,845 |
| BPS 4     | 197,791 |
| BPS 5     | 164,835 |
| BPS 6     | 182,942 |
| BPS 7     | 196,858 |
| BPS 8     | 200,686 |
| BPS 9     | 205,908 |
| BPS 10    | 195,259 |
| BPS 11    | 146,606 |
| BPS 12    | 206,627 |
| BPS 13    | 213,364 |
| BPS 14    | 209,023 |
| BPS 15    | 203,630 |

**Supplemental Table 2**

| <b>Exposure</b> | <b>Ko ID</b> | <b>Pathways</b>                                     |
|-----------------|--------------|-----------------------------------------------------|
| BDE-47          | Ko00120      | Primary Bile Acid Biosynthesis                      |
|                 | Ko00121      | Secondary bile acid biosynthesis                    |
|                 | Ko03060      | Protein Export                                      |
|                 | Ko00471      | D-Glutamine and D-glutamate metabolism              |
|                 | Ko00740      | Riboflavin metabolism                               |
|                 | Ko04964      | Proximal tubule bicarbonate reclamation             |
|                 | Ko04070      | Phosphatidylinositol signaling system               |
|                 | Ko03010      | Ribosome                                            |
|                 | Ko00312      | Beta-Lactam resistance                              |
|                 | Ko00311      | Penicillin and cephalosporin biosynthesis           |
|                 | Ko00900      | Terpenoid backbone biosynthesis                     |
|                 | TBBPA        | Ko00945                                             |
| Ko00281         |              | Geraniol degradation                                |
| Ko00740         |              | Riboflavin metabolism                               |
| Ko00531         |              | Glycosaminoglycan metabolism                        |
| Ko03010         |              | Ribosome                                            |
| Ko00623         |              | Toluene degradation                                 |
| Ko00780         |              | Biotin metabolism                                   |
| Ko00190         |              | Oxidative Phosphorylation                           |
| Ko00785         |              | Lipoic acid metabolism                              |
| Ko03070         |              | Bacterial Secretion system                          |
| Ko00604         |              | Glycosphingolipid metabolism                        |
| Ko00130         |              | Ubiquinone and other terpenoid-quinone biosynthesis |
| Ko00670         |              | One carbon pool by folate                           |
| Ko04146         |              | Peroxisome                                          |
| Ko00511         |              | Other glycan degradation                            |
| Ko00910         |              | Nitrogen metabolism                                 |
| Ko00523         |              | Polyketide sugar unit biosynthesis                  |
| Ko00540         |              | Lipopolysaccharide biosynthesis                     |
| Ko03018         |              | RNA degradation                                     |
| Ko00790         |              | Folate biosynthesis                                 |
| Ko03060         |              | Protein export                                      |
| Ko00521         |              | Streptomycin biosynthesis                           |
| Ko04070         |              | Phosphatidylinositol signaling system               |
| BPS             | Ko00364      | Fluorobenzoate degradation                          |
|                 | Ko00900      | Terpenoid backbone synthesis                        |

**Supplemental Table 3.**

| <b>Primers</b>   | <b>Sequences</b>      |
|------------------|-----------------------|
| IL-2 Forward     | GAGTCAGCAACTGTGGTGGA  |
| IL-2 Reverse     | AGGGCTTGTTGAGATGATGC  |
| IL-4 Forward     | TCAACCCCCAGCTAGTTGTC  |
| IL-4 Reverse     | GGTGTTCTTCGTTGCTGTGA  |
| IL-12p40 Forward | CACACTGGACCAAAGGGACT  |
| IL-12p40 Reverse | ATTTATTCTGCTGCCGTGCT  |
| IL-12p35 Forward | CTCCTGTGGGAGAAGCAGAC  |
| IL-12p35 Reverse | CAGATAGCCCATCACCTGT   |
| Cyp7a1 Forward   | CAACGGGTTGATTCCATACC  |
| Cyp7a1 Reverse   | ATTTCCCCATCAGTTTGCAG  |
| Gapdh Forward    | GGCAAATTCAACGGCACAGT  |
| Gapdh Reverse    | GTCTCGCTCCTGGAAGATGG  |
| Nqo1 Forward     | TCTGCAGCTTCCAGCTTCTTG |
| Nqo1 Reverse     | TCTGCAGCTTCCAGCTTCTTG |
| Gapdx Forward    | AGTGGGTGAACCCTCACAAG  |
| Gapdx Reverse    | AGCTGGGTTTACTGGTGGTG  |

# Figure S1

## A

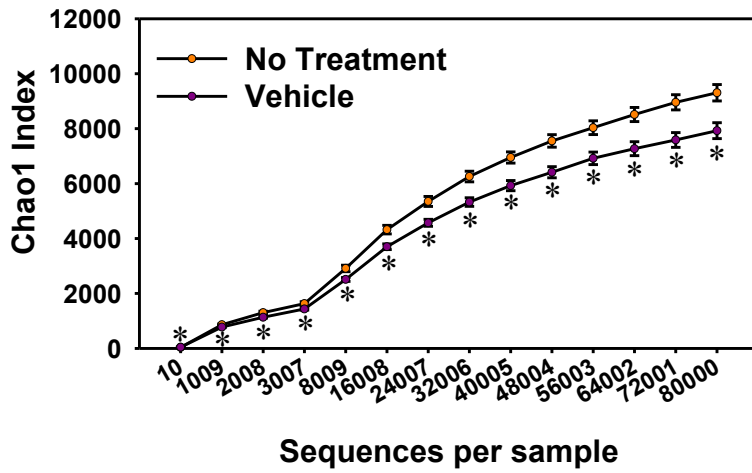

## B

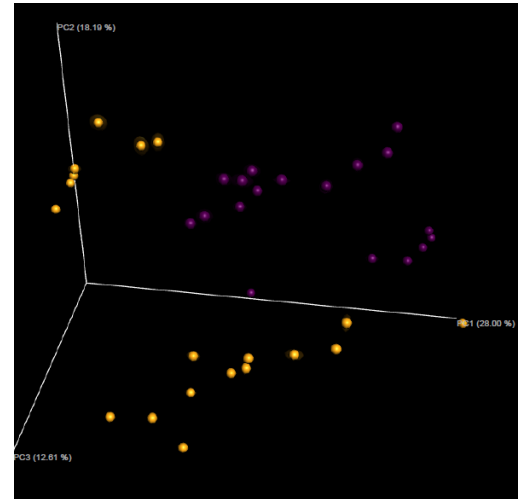

● No Treatment  
● Vehicle

## C

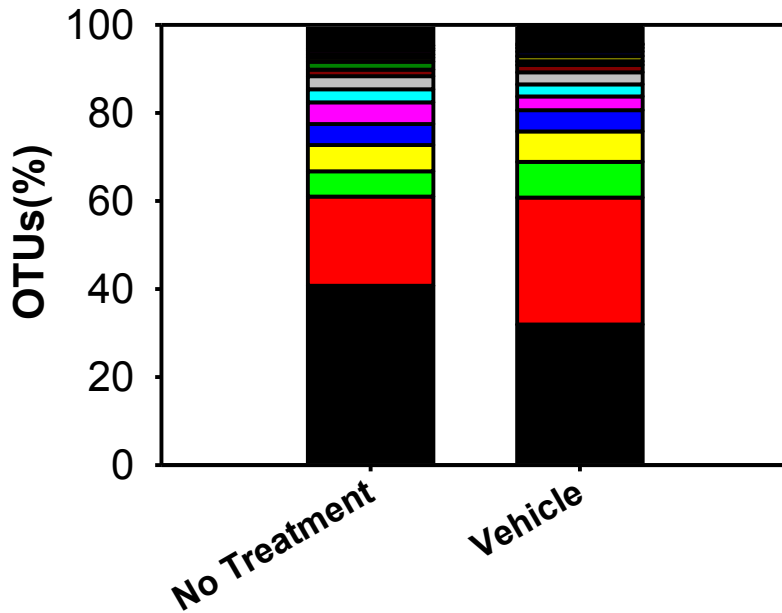

## D

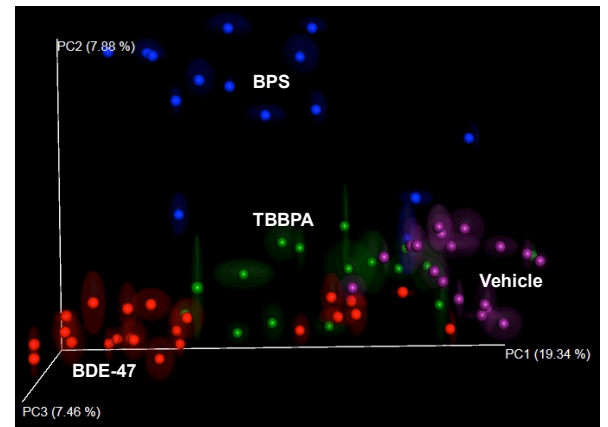

● Vehicle ● BDE-47 ● TBBPA ● BPS

- \* *p\_\_Bacteroidetes;c\_\_Bacteroidia;o\_\_Bacteroidales;f\_\_S24-7;g\_\_s\_\_*
- \* *p\_\_Firmicutes;c\_\_Clostridia;o\_\_Clostridiales;f\_\_g\_\_s\_\_*
- \* *p\_\_Firmicutes;c\_\_Clostridia;o\_\_Clostridiales;f\_\_Lachnospiraceae;g\_\_s\_\_*
- \* *p\_\_Bacteroidetes;c\_\_Bacteroidia;o\_\_Bacteroidales;f\_\_Rikenellaceae;g\_\_s\_\_*
- \* *p\_\_Firmicutes;c\_\_Clostridia;o\_\_Clostridiales;f\_\_Ruminococcaceae;g\_\_Oscillospira;s\_\_*
- \* *p\_\_Firmicutes;c\_\_Bacilli;o\_\_Lactobacillales;f\_\_Lactobacillaceae;g\_\_Lactobacillus;s\_\_*
- \* *p\_\_Firmicutes;c\_\_Clostridia;o\_\_Clostridiales;f\_\_Ruminococcaceae;g\_\_s\_\_*
- \* *p\_\_Firmicutes;c\_\_Clostridia;o\_\_Clostridiales;f\_\_Ruminococcaceae;g\_\_s\_\_*
- \* *p\_\_Firmicutes;c\_\_Clostridia;o\_\_Clostridiales;f\_\_Ruminococcaceae;g\_\_Ruminococcus;s\_\_*
- \* *p\_\_Bacteroidetes;c\_\_Bacteroidia;o\_\_Bacteroidales;f\_\_Bacteroidaceae;g\_\_Bacteroides;s\_\_*
- \* *p\_\_Bacteroidetes;c\_\_Bacteroidia;o\_\_Bacteroidales;f\_\_[Odoribacteraceae];g\_\_Odoribacter;s\_\_*
- \* *p\_\_Firmicutes;c\_\_Clostridia;o\_\_Clostridiales;f\_\_Lachnospiraceae;g\_\_[Ruminococcus];s\_\_gnavus*
- \* *p\_\_Bacteroidetes;c\_\_Bacteroidia;o\_\_Bacteroidales;f\_\_Prevotellaceae;g\_\_Prevotella;s\_\_*
- \* *p\_\_Tenericutes;c\_\_Mollicutes;o\_\_RF39;f\_\_g\_\_s\_\_*
- \* *p\_\_Bacteroidetes;c\_\_Bacteroidia;o\_\_Bacteroidales;f\_\_Bacteroidaceae;g\_\_Bacteroides;s\_\_acidifaciens*
- \* Other

Figure S2

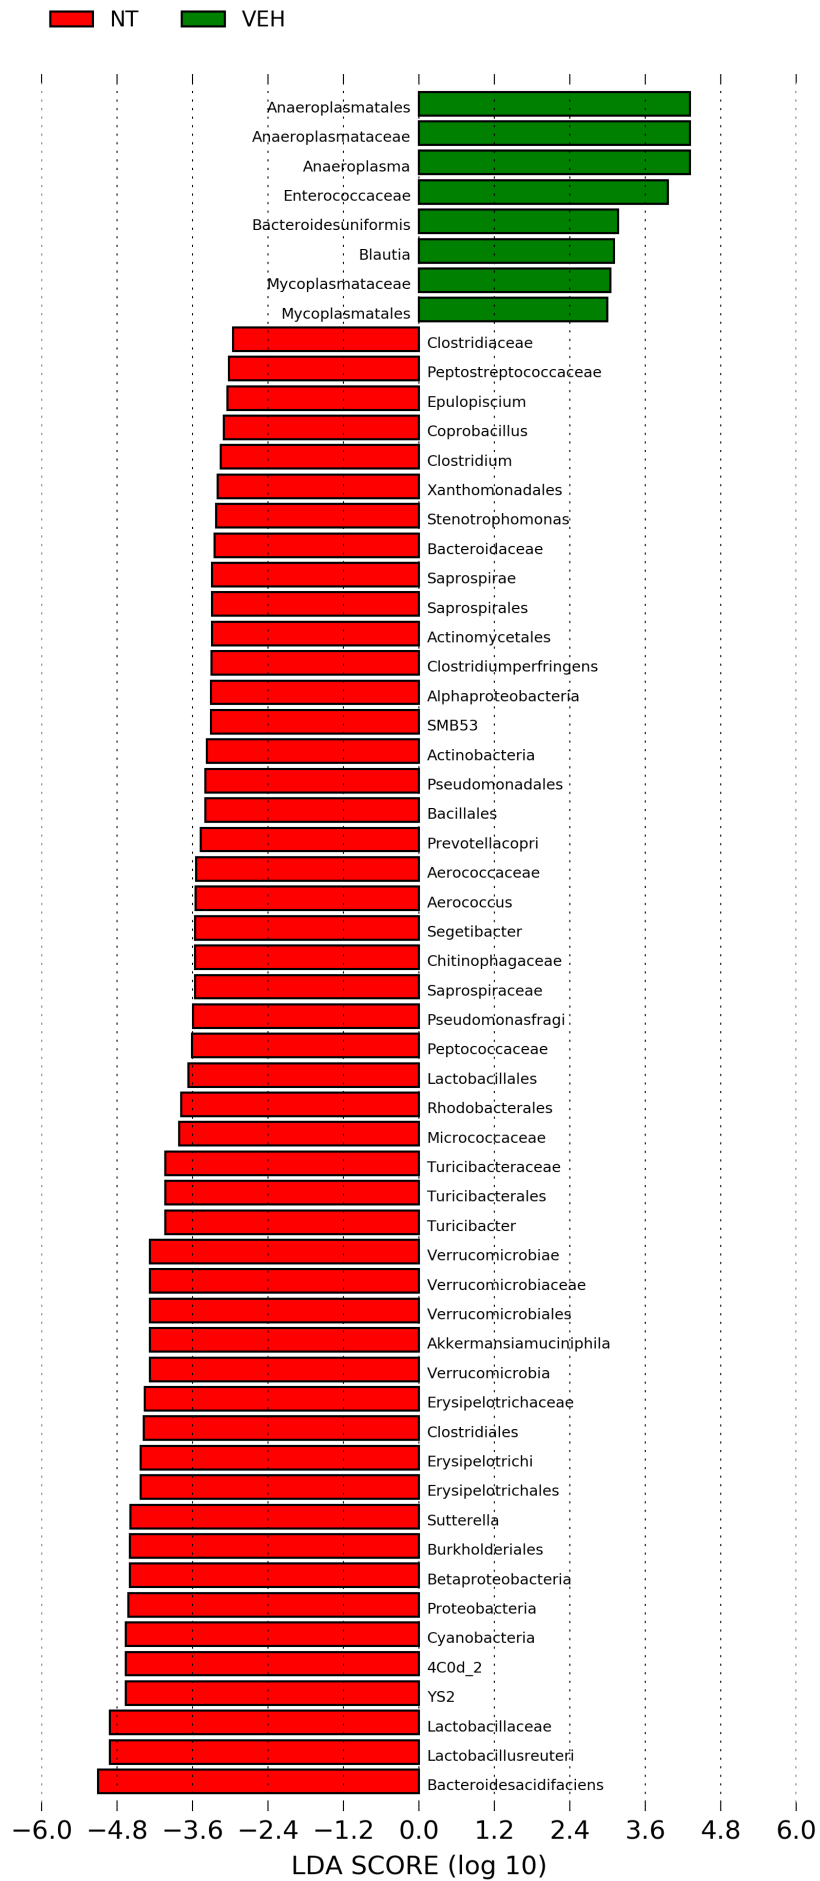

# Figure S3

No treatment1  
 No treatment13  
 Vehicle13  
 No treatment16  
 No treatment19  
 No treatment9  
 No treatment18  
 No treatment14  
 No treatment15  
 No treatment12  
 No treatment4  
 No treatment7  
 No treatment5  
 No treatment10  
 No treatment2  
 No treatment3  
 No treatment8  
 No treatment17  
 No treatment6  
 No treatment11  
 Vehicle16  
 Vehicle17  
 Vehicle15  
 Vehicle1  
 Vehicle2  
 Vehicle3  
 Vehicle6  
 Vehicle4  
 Vehicle8  
 Vehicle12  
 Vehicle10  
 Vehicle5  
 Vehicle14  
 Vehicle18  
 Vehicle7  
 Vehicle11  
 Vehicle9

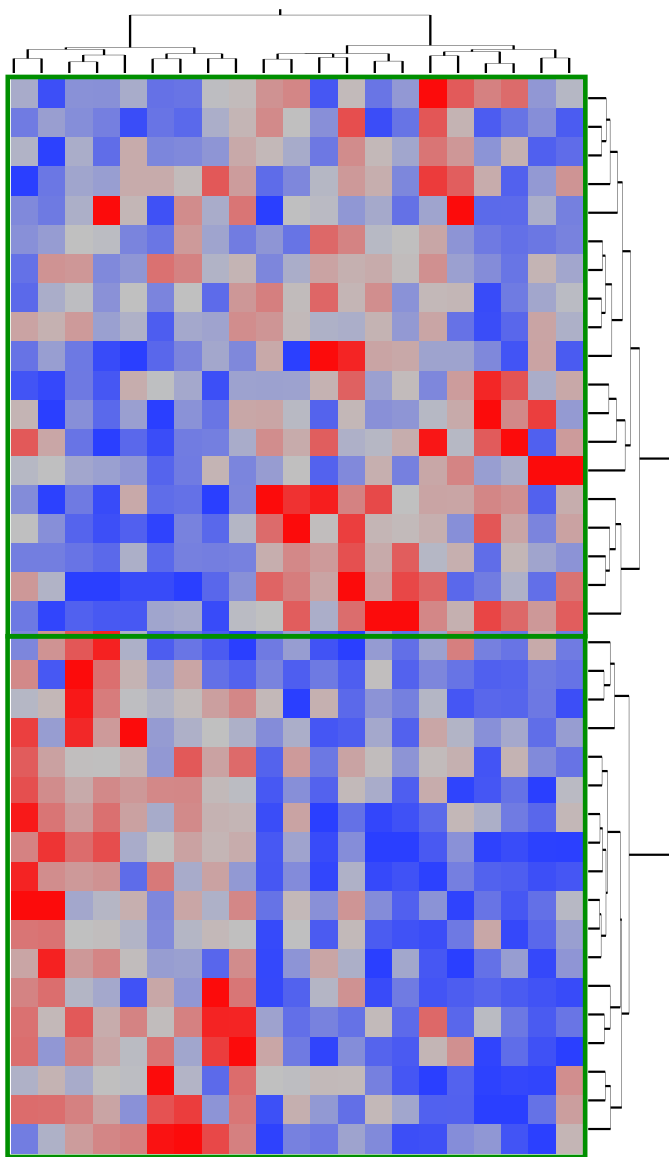

p\_Firmicutes;Clostridia;Clostridiales;Peptococcaceae;rc4-4;s  
 p\_Firmicutes;Clostridia;Clostridiales;Ruminococcaceae;Other;Other  
 p\_Firmicutes;Clostridia;Clostridiales;g\_s  
 p\_Firmicutes;Clostridia;Clostridiales;Lachnospiraceae;g\_s  
 p\_Firmicutes;Clostridia;Clostridiales;Lachnospiraceae;Other;Other  
 p\_Tenericutes;Mollicutes;Anaeroplasmatales;Anaeroplasmataceae;g\_s  
 p\_Firmicutes;Clostridia;Clostridiales;Lachnospiraceae;g\_s  
 p\_Tenericutes;Mollicutes;RF39;g\_s  
 p\_Bacteroidetes;Bacteroidia;Bacteroidales;[Odoribacteraceae];g  
 p\_Bacteroidetes;Bacteroidia;Bacteroidales;Bacteroidaceae;Bacteroides;acidifaciens  
 p\_Firmicutes;Erysipelotrichia;Erysipelotrichales;Erysipelotrichaceae;g\_s  
 p\_Bacteroidetes;Bacteroidia;Bacteroidales;Bacteroidaceae;Bacteroides;g\_s  
 p\_Bacteroidetes;Bacteroidia;Bacteroidales;S24-7;g\_s  
 p\_Firmicutes;Bacillio;Lactobacillales;Lactobacillaceae;Lactobacillus;reuteri  
 p\_Proteobacteria;Betaproteobacteria;Burkholderiales;Alcaligenaceae;Sutterella;s  
 p\_Firmicutes;Bacillio;Bacillales;Bacillaceae;Bacillus;Other  
 p\_Firmicutes;Clostridia;Clostridiales;Lachnospiraceae;g\_s  
 p\_Firmicutes;Clostridia;Clostridiales;Other;Other;Other  
 p\_Firmicutes;Clostridia;Clostridiales;Clostridiaceae;g\_s  
 p\_Cyanobacteria;4C0d-2o;Y52;f;g\_s  
 p\_Firmicutes;Bacillio;Lactobacillales;Lactobacillaceae;Lactobacillus;g\_s



# Figure S4

## A

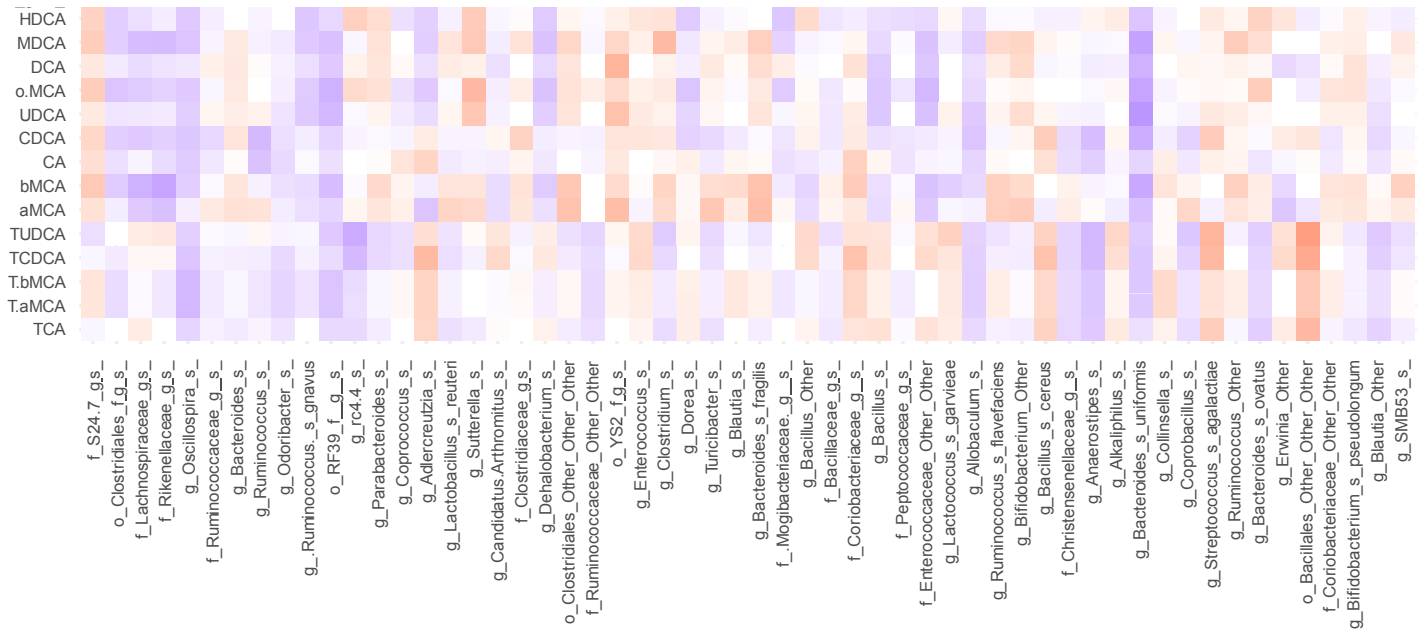

## B

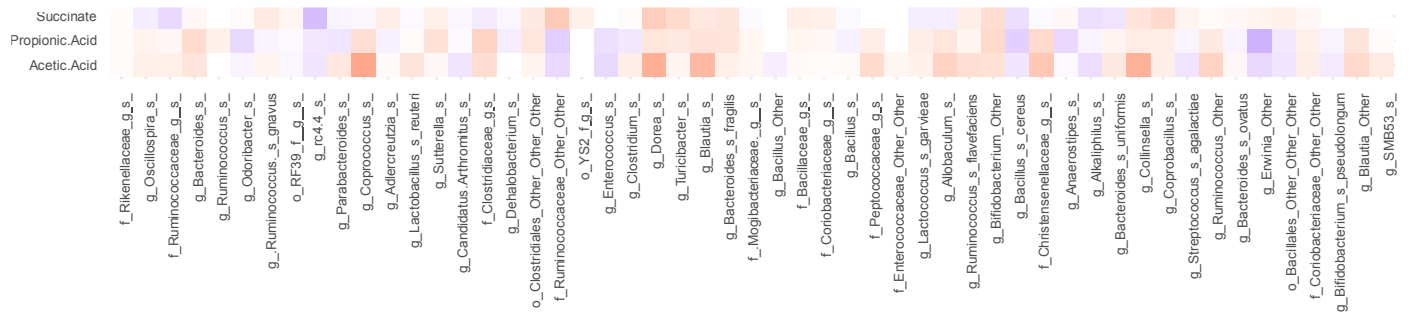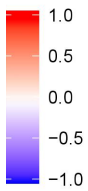

**Pearson's correlation**

# Figure S5

ko00120

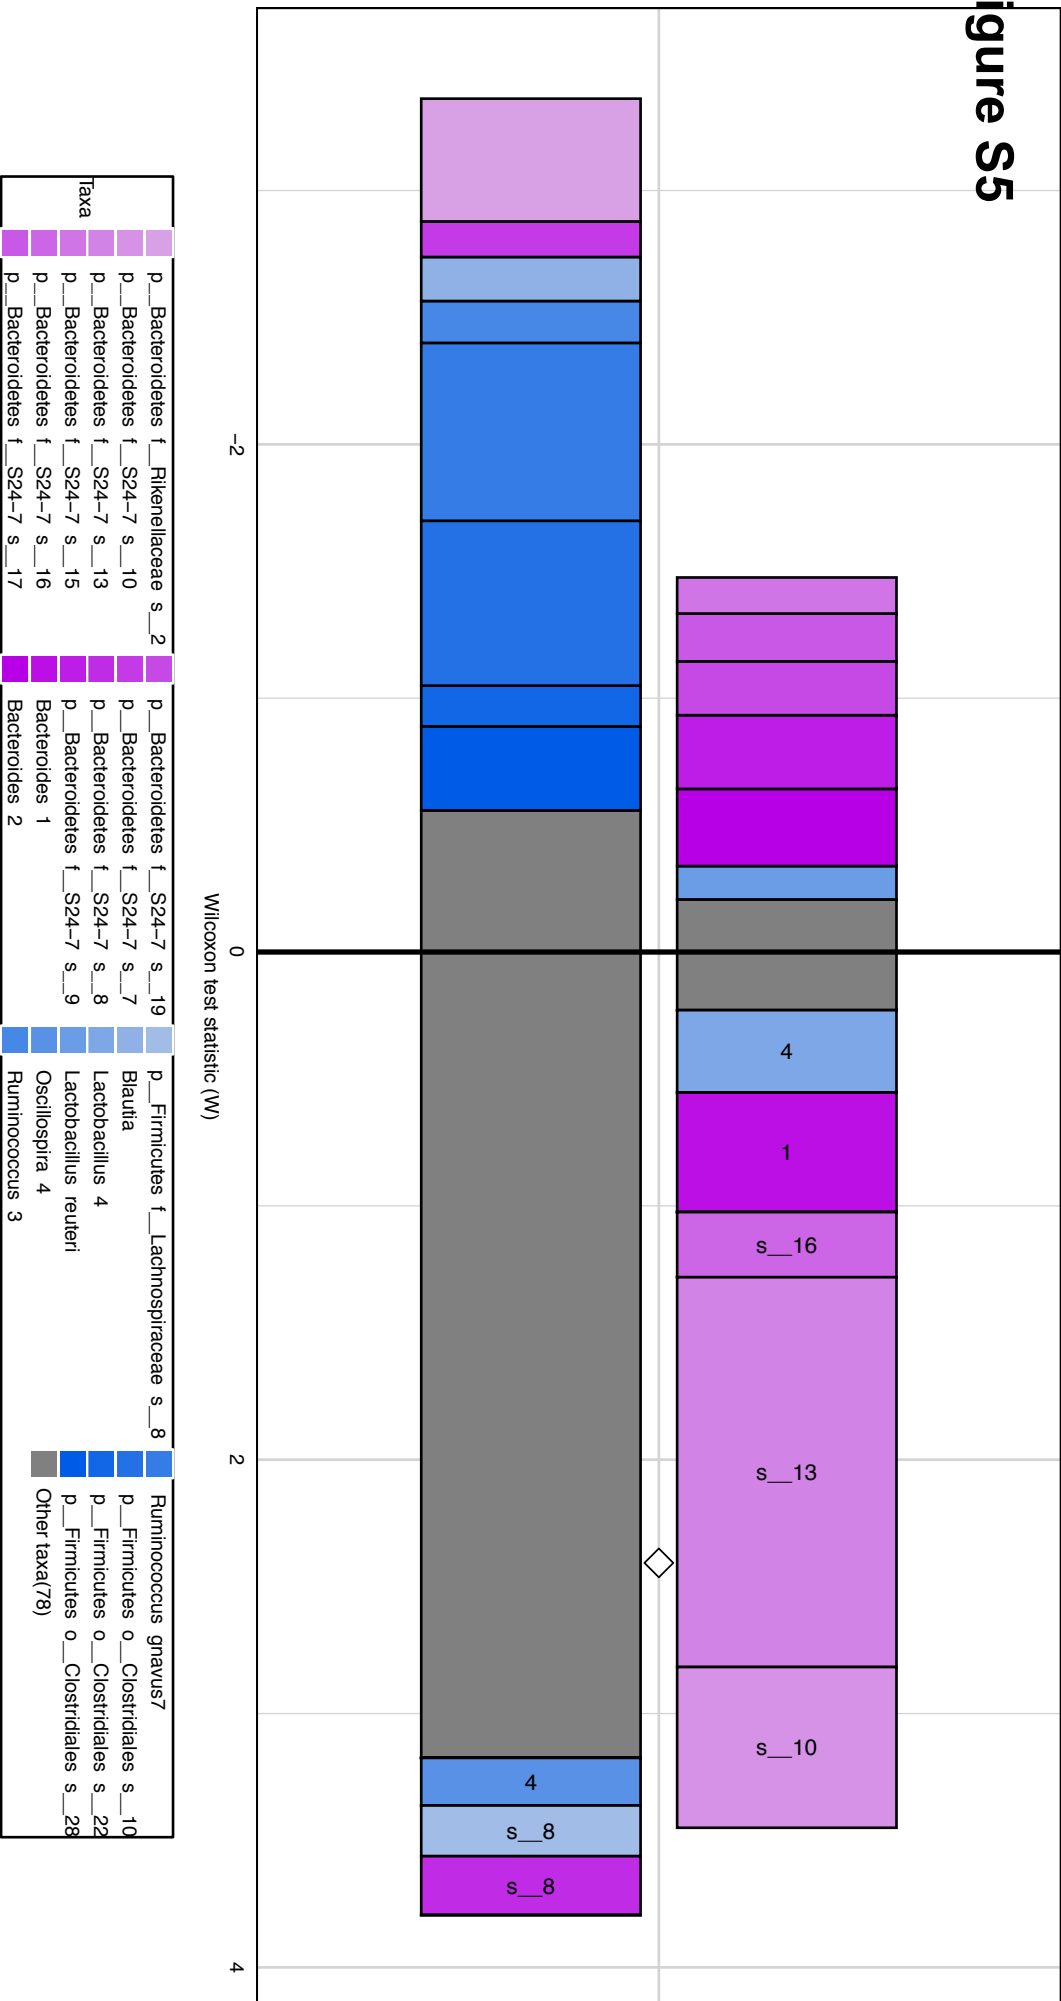

# Figure S6

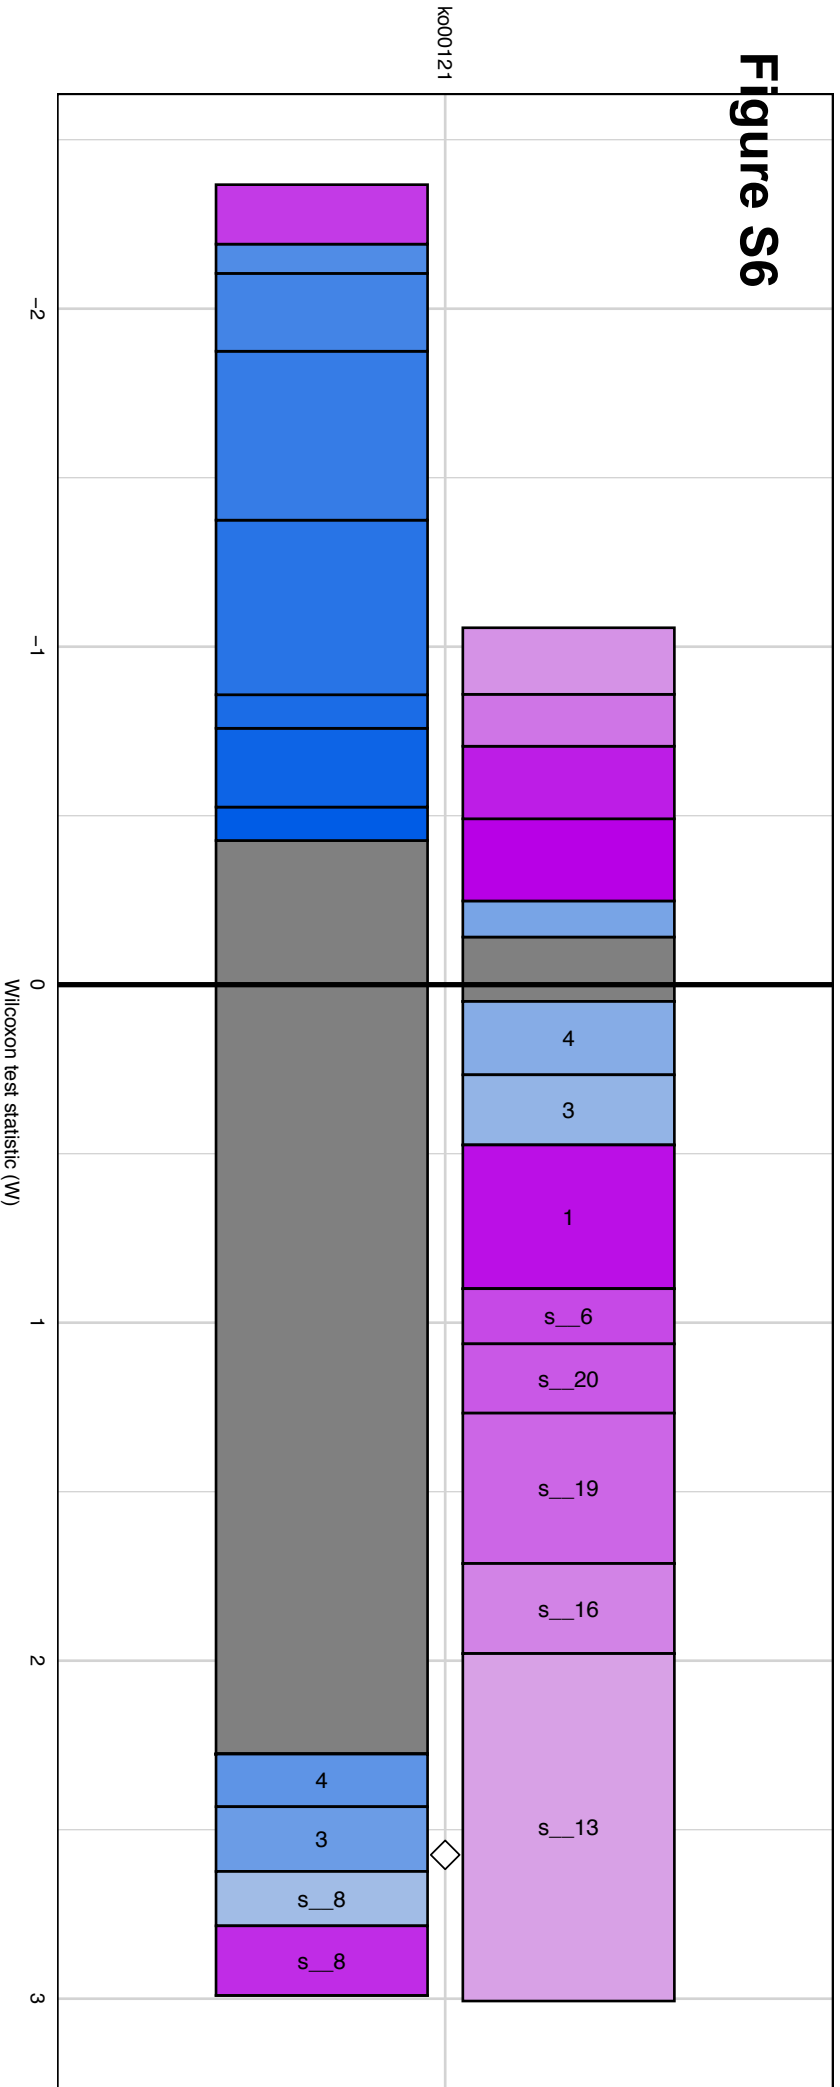

K000121

# Figure S7

ko03060

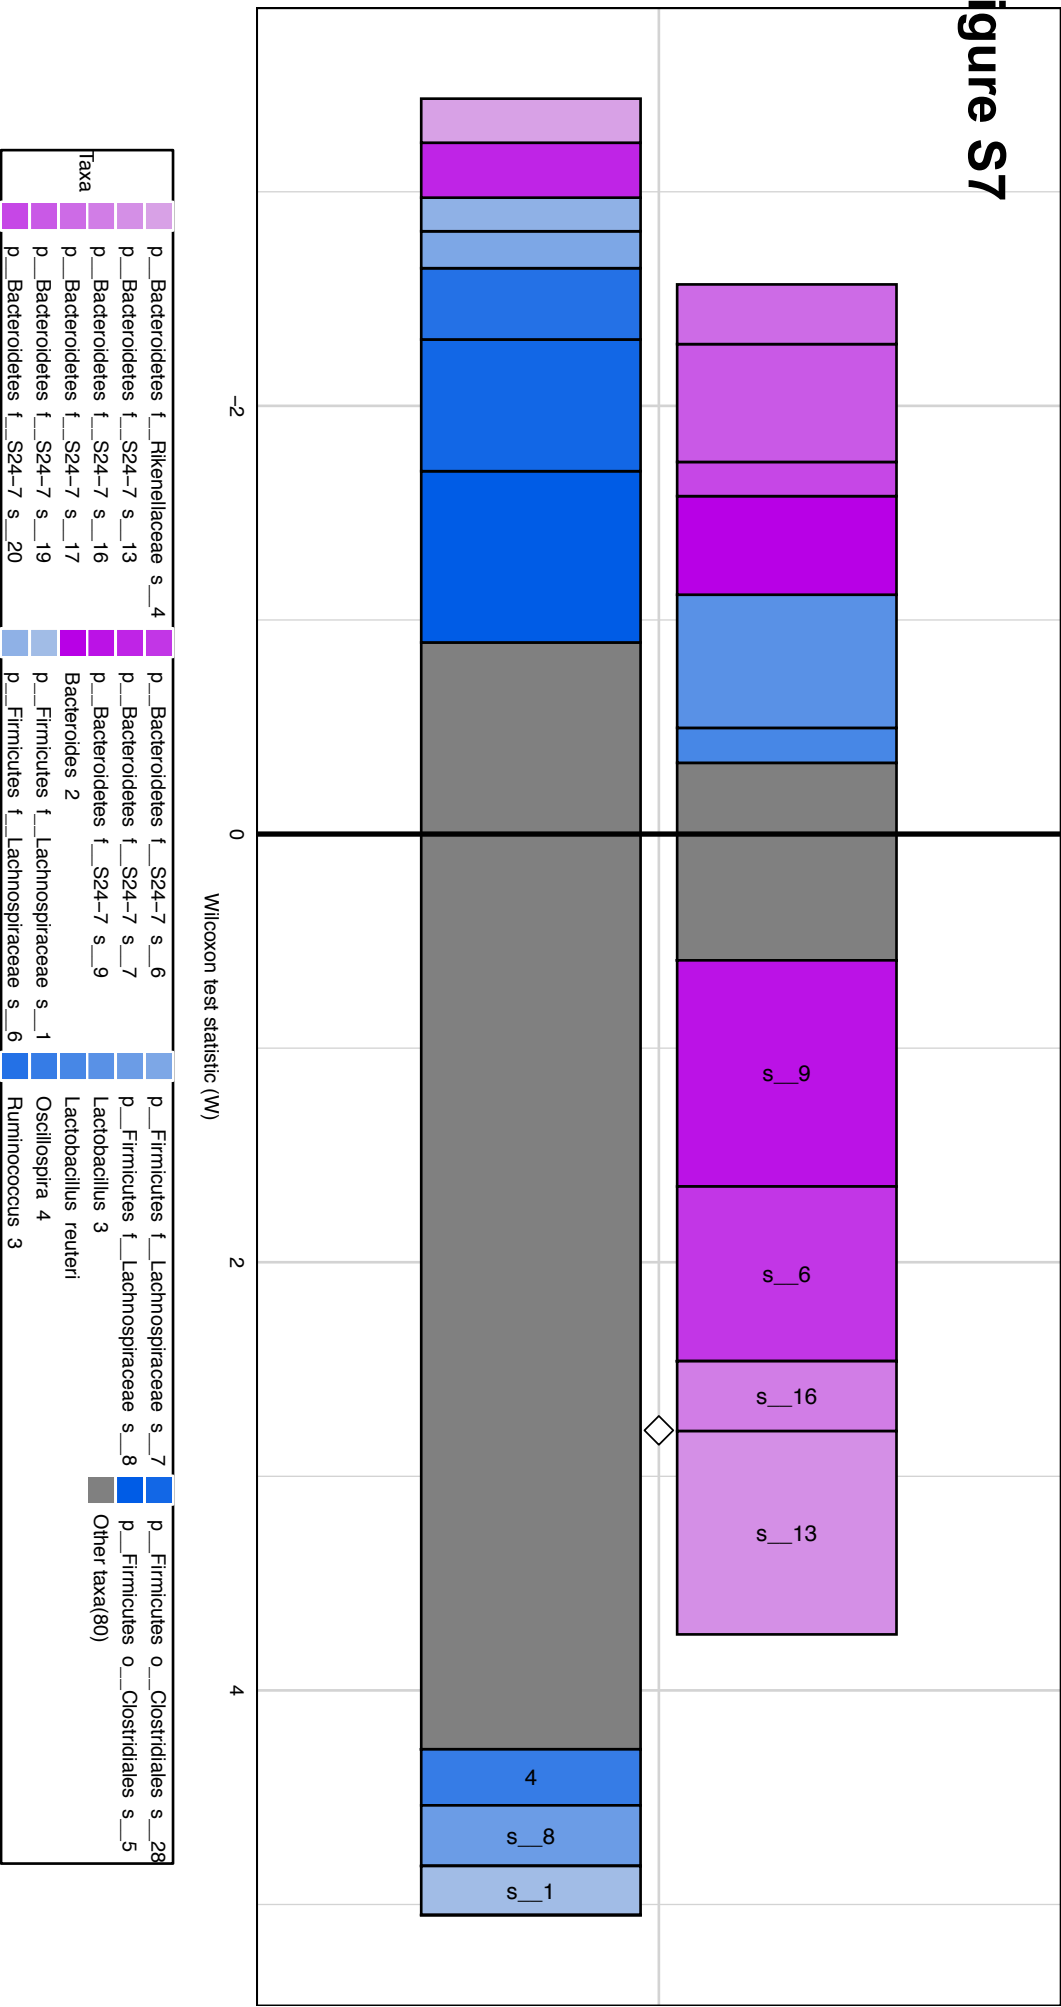

# Figure S8

k000471

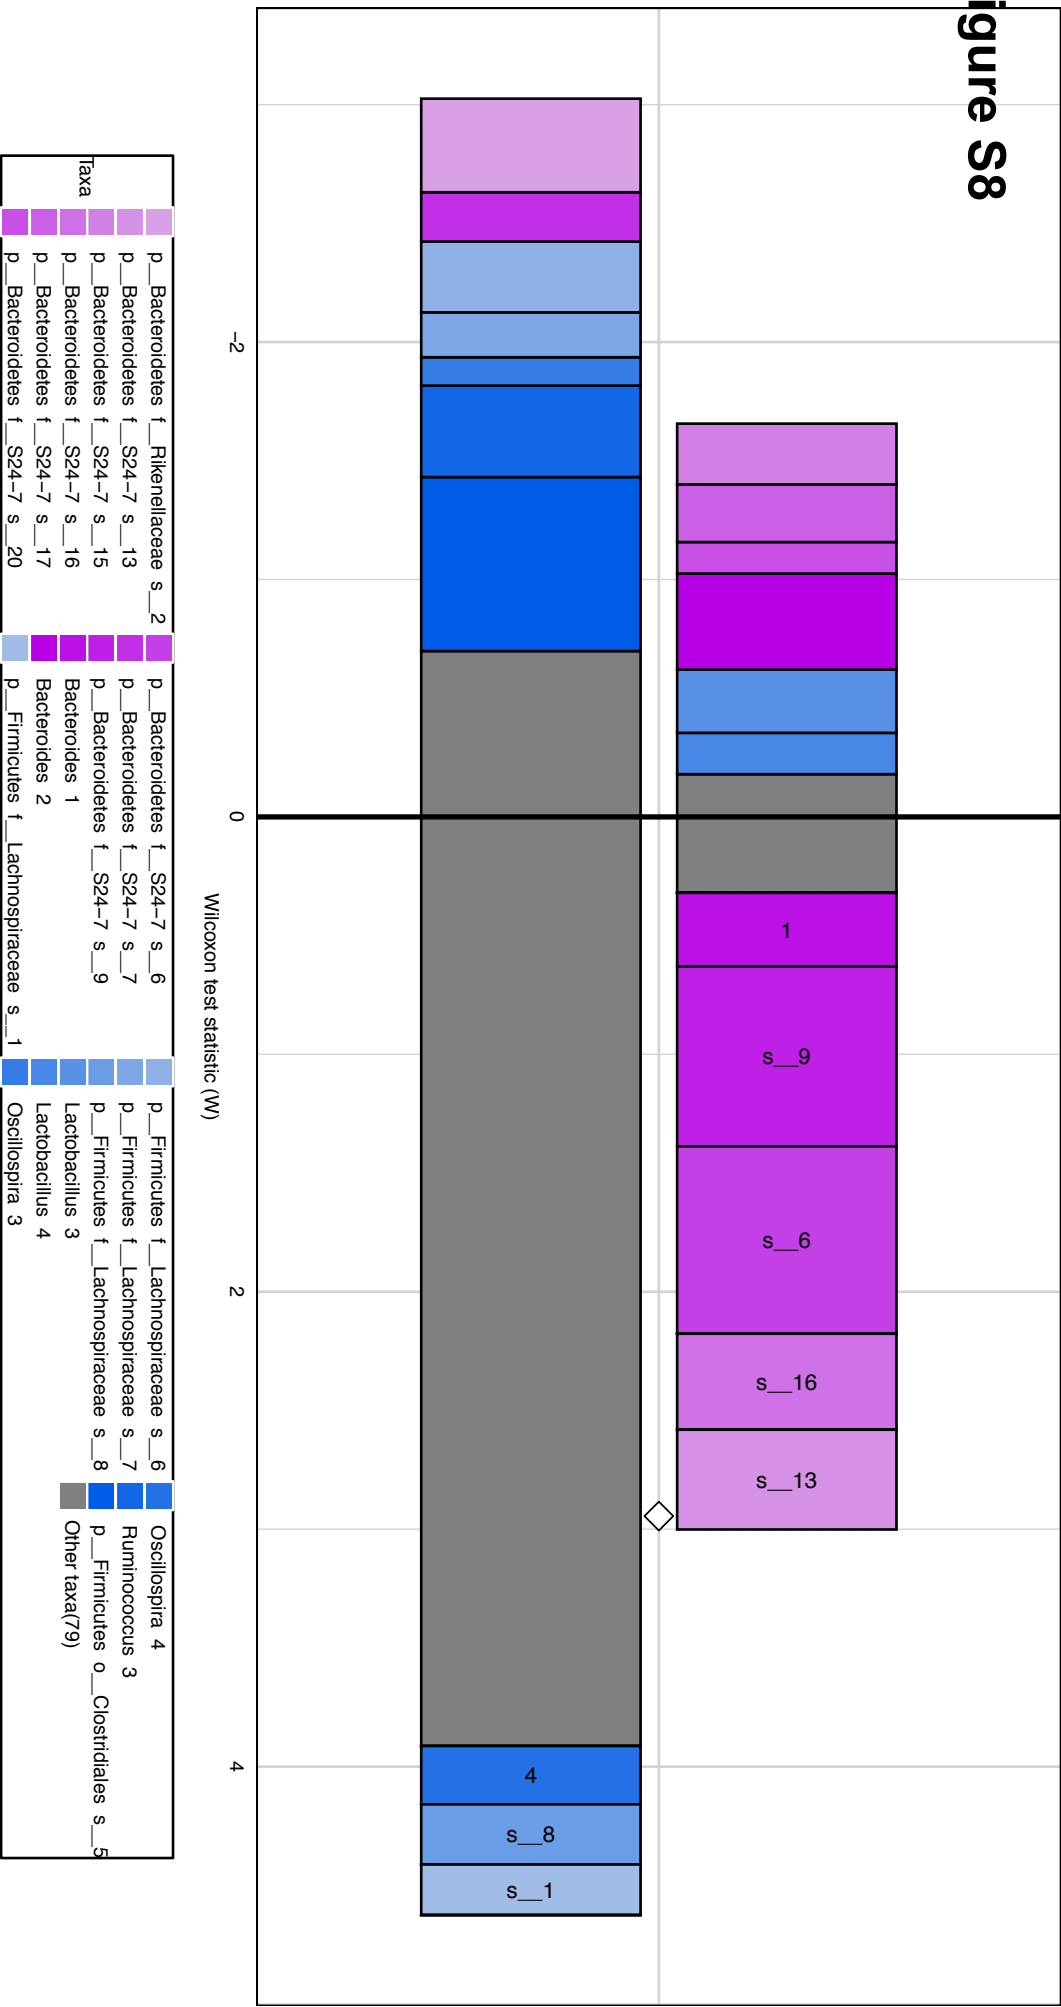



# Figure S10

K004964

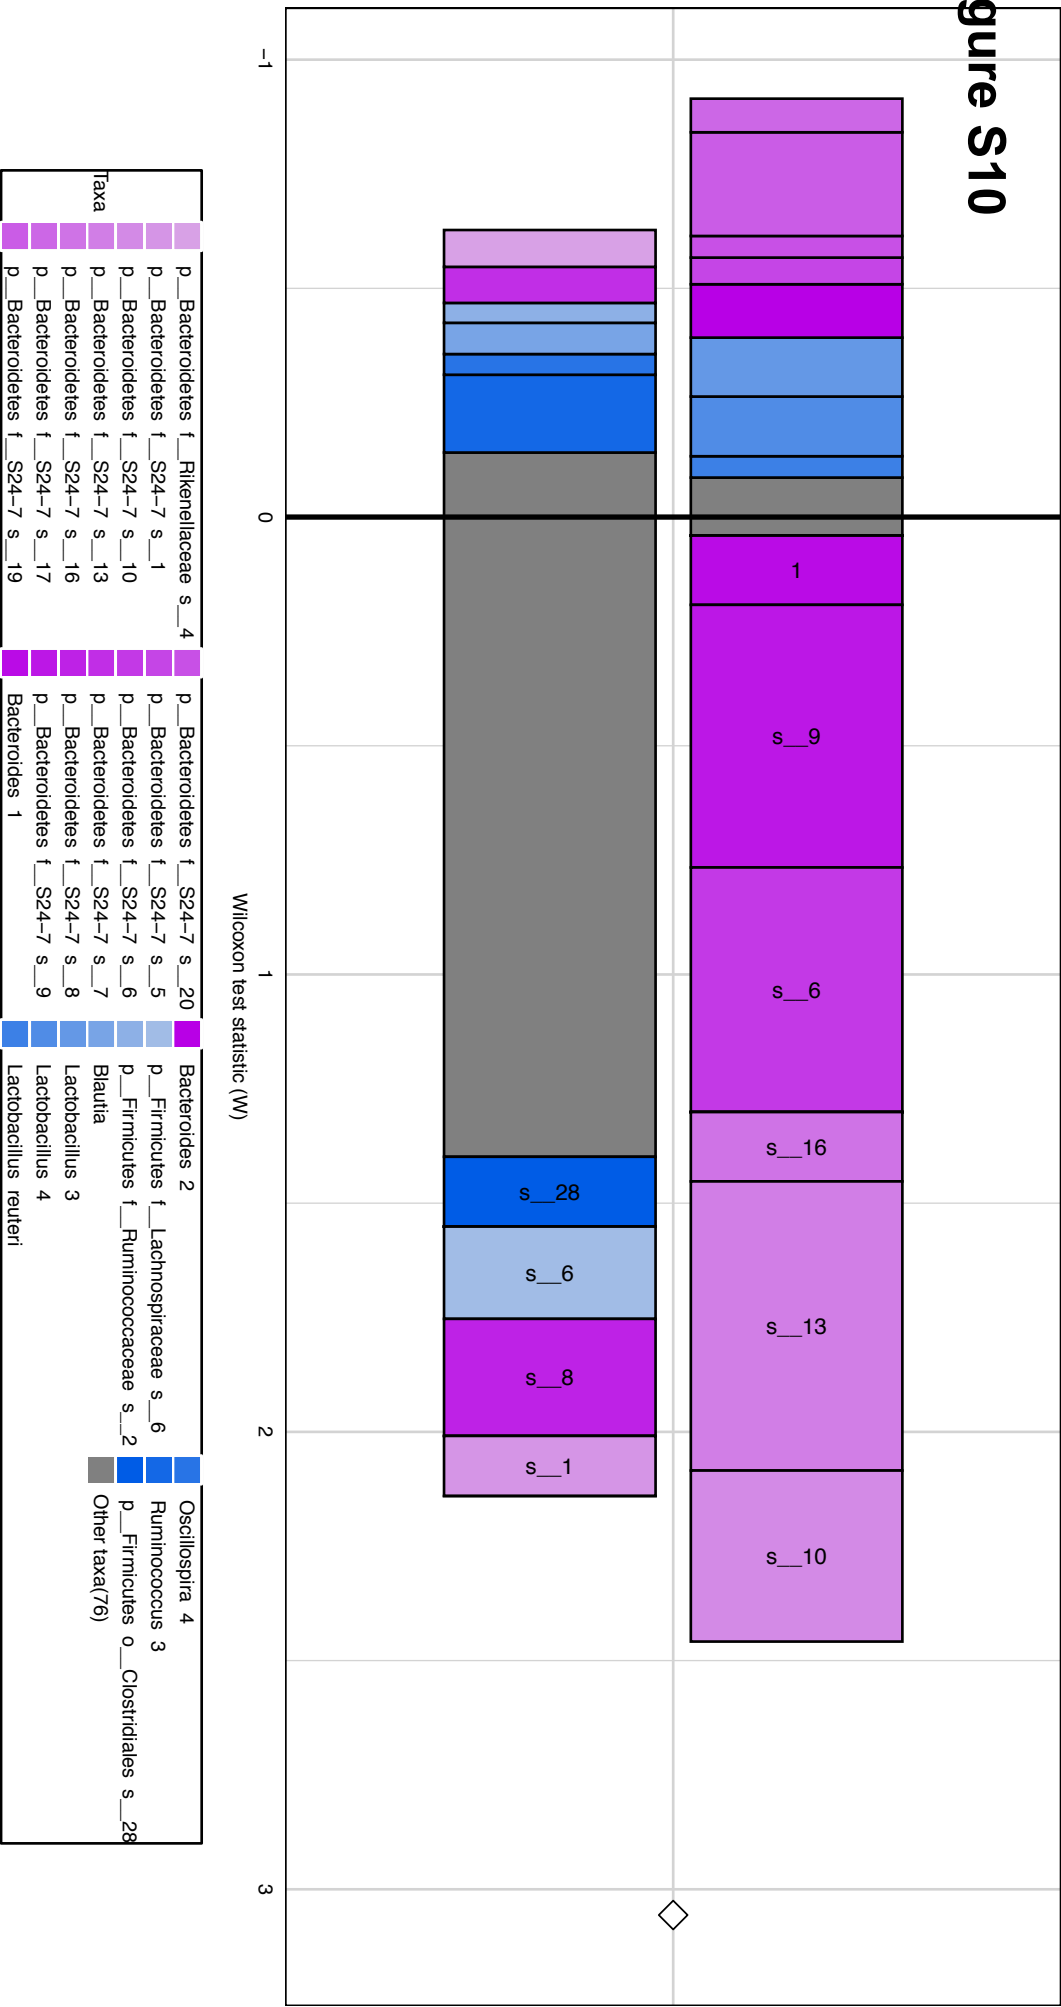

# Figure S11

ko04070

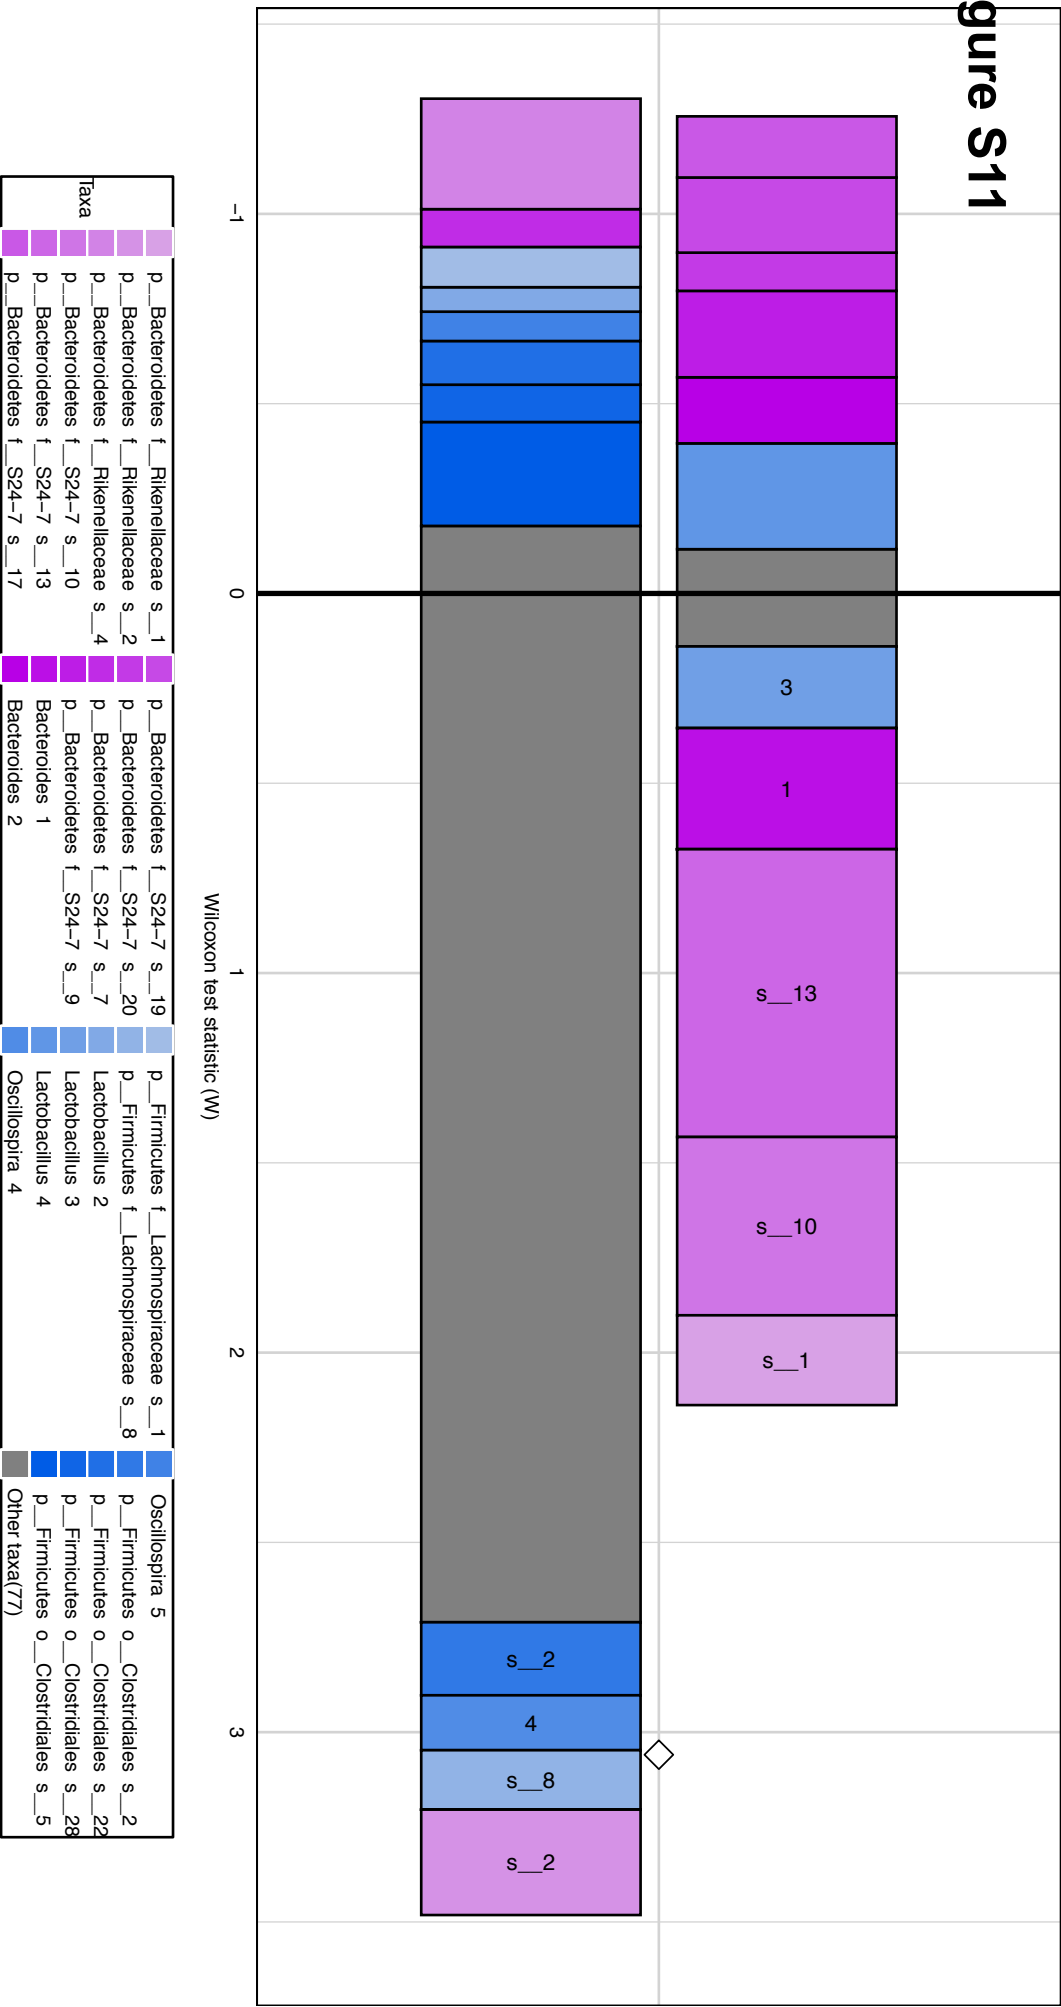



# Figure S12

ko03010

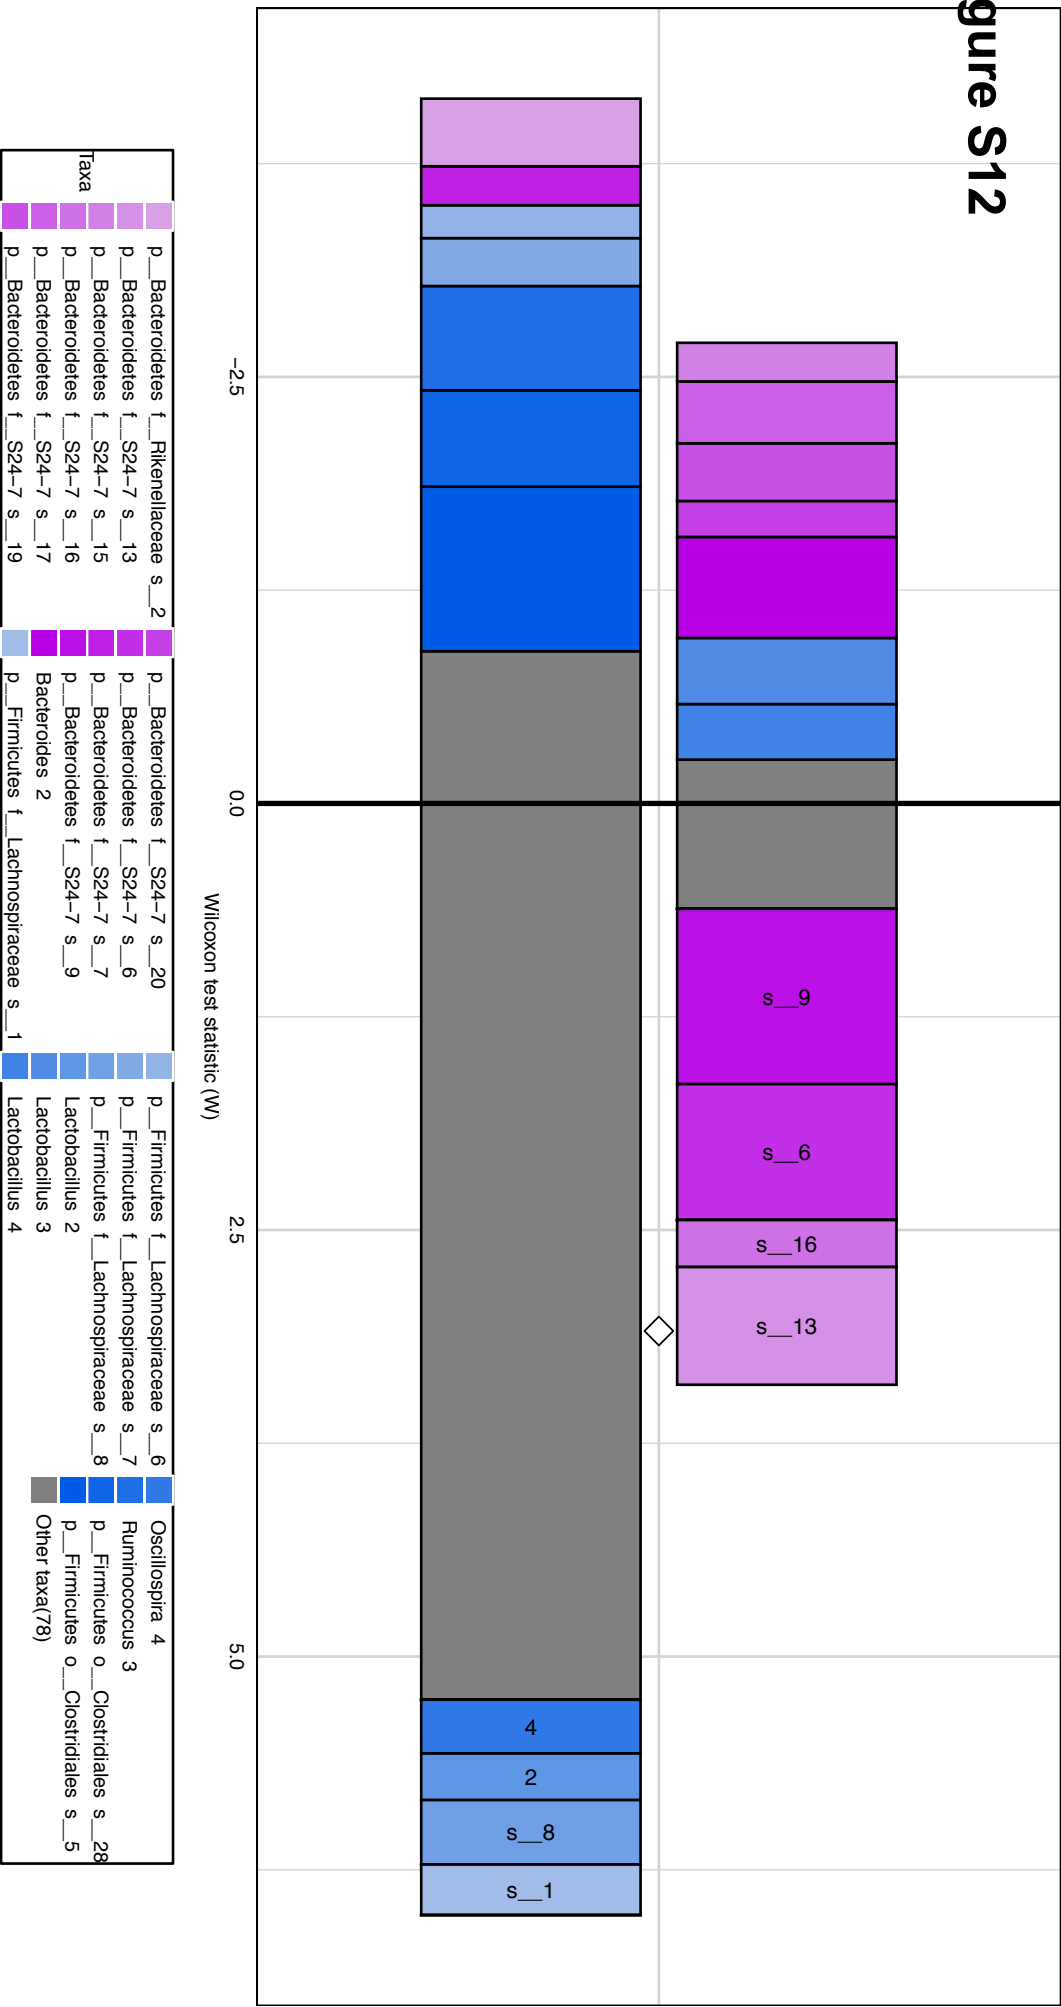

# Figure S13

ko00312

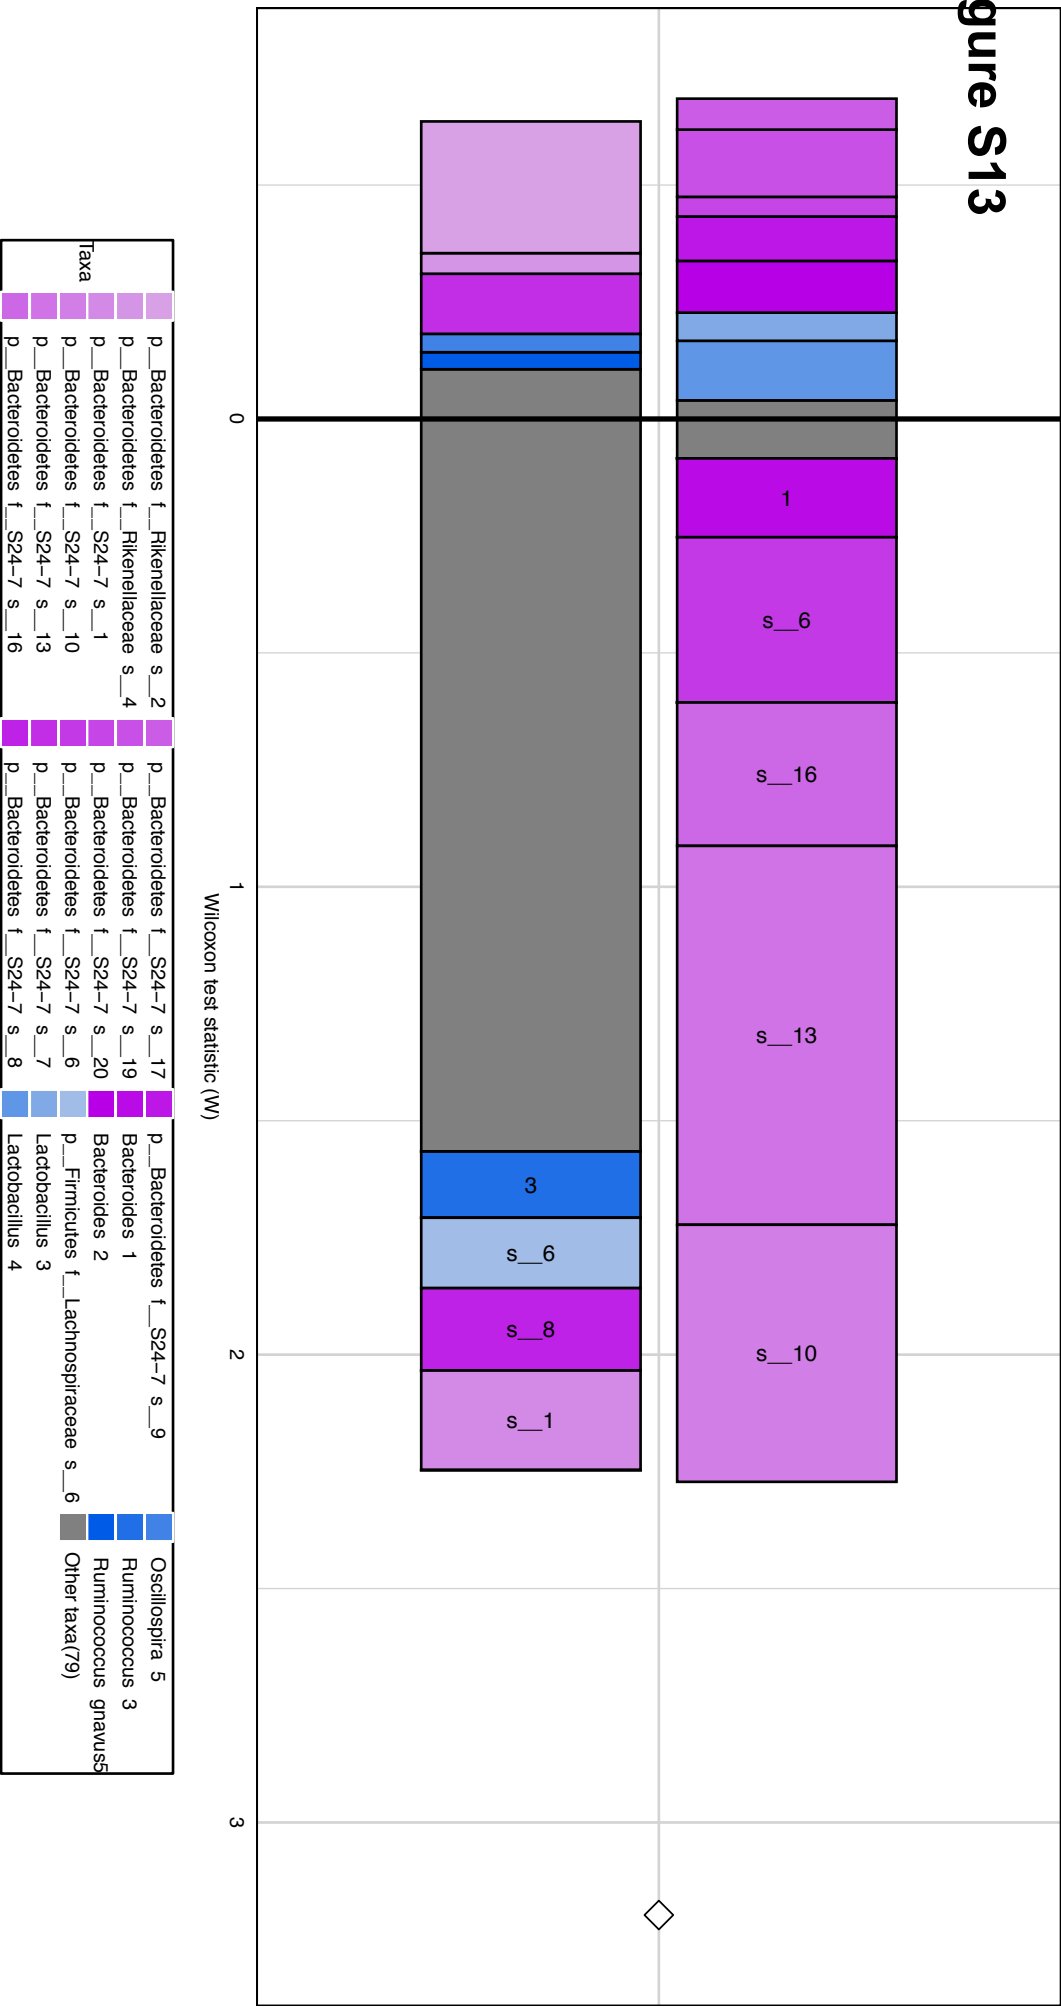

# Figure S14

ko00311

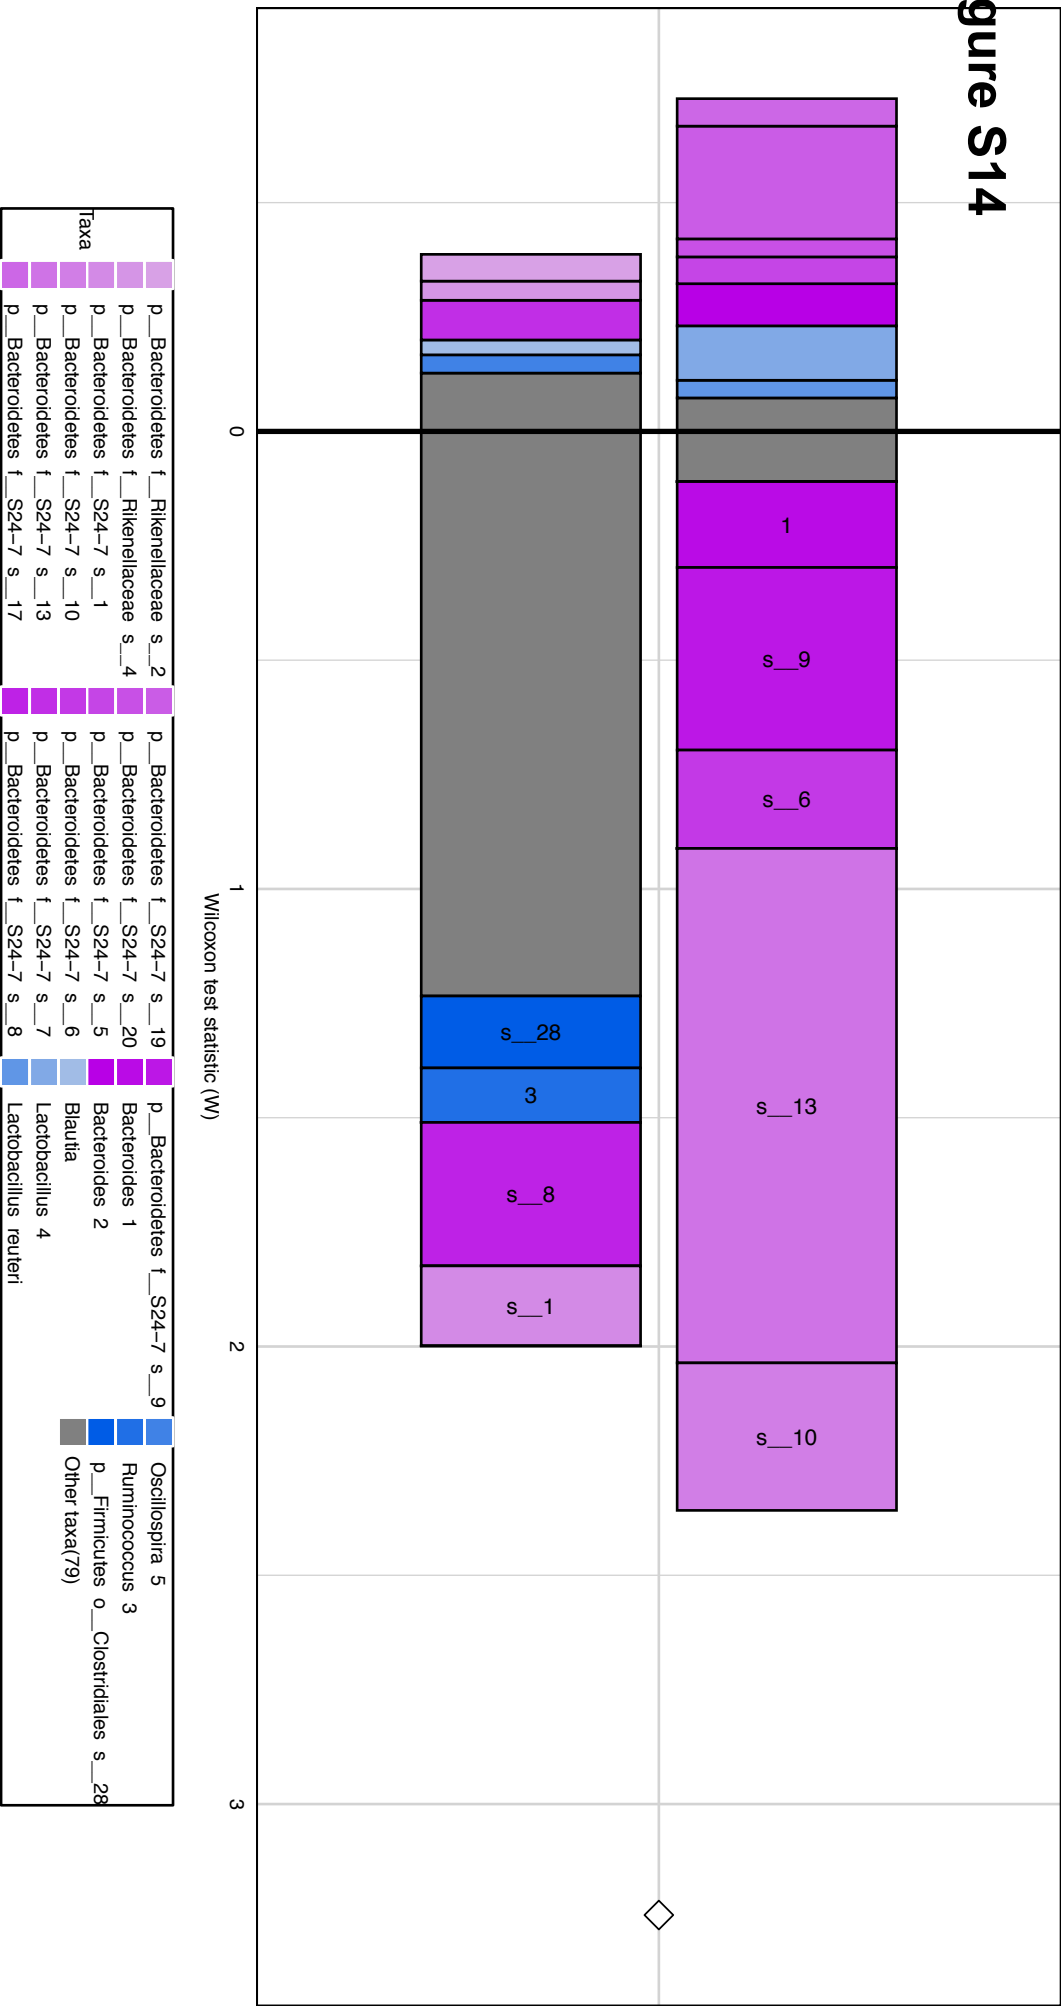

# Figure S15

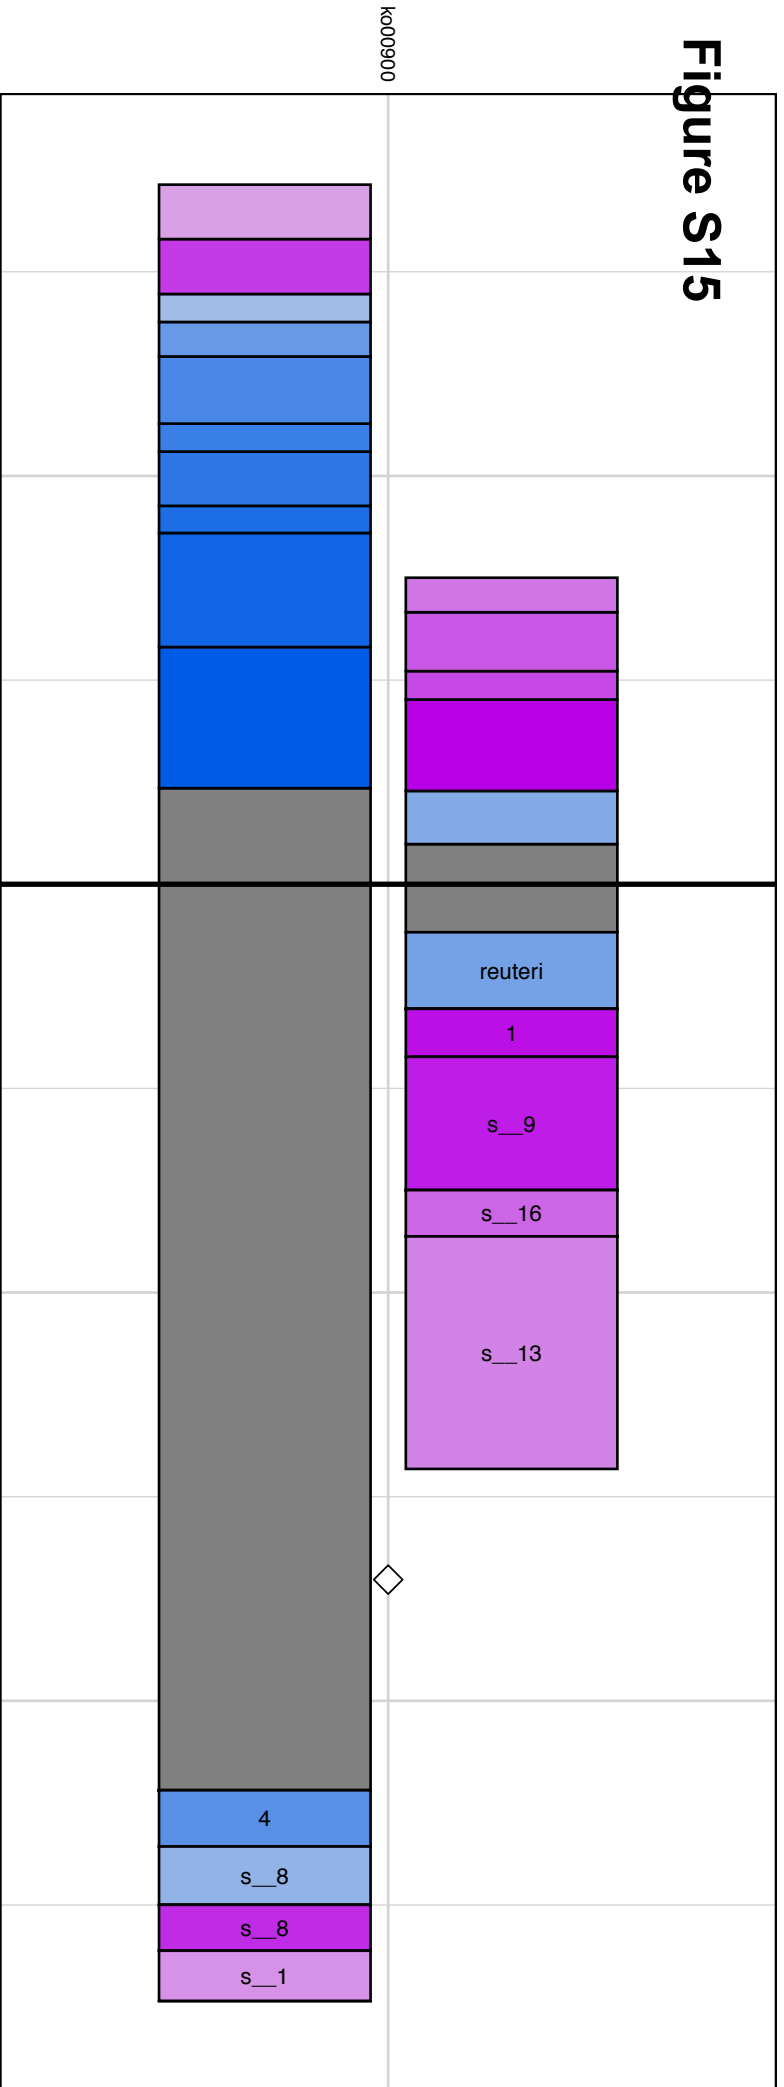

k000900

# Figure S16

ko00945

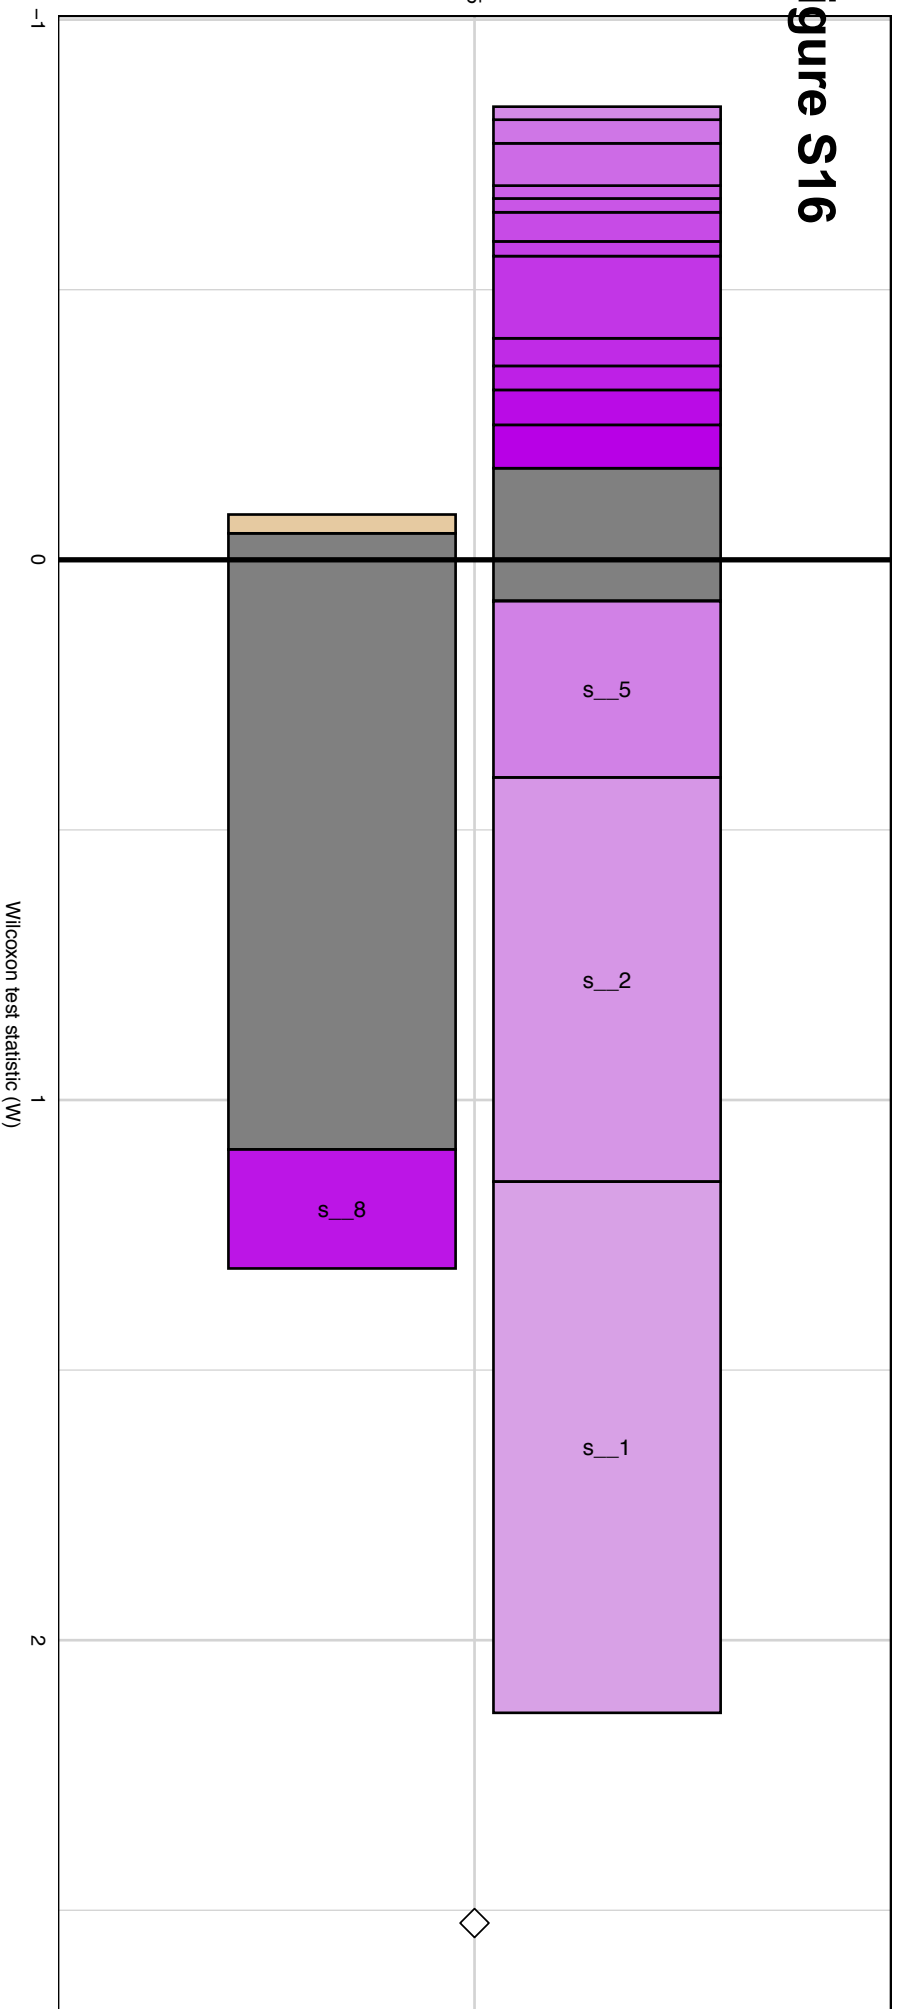

# Figure S17

ko00281

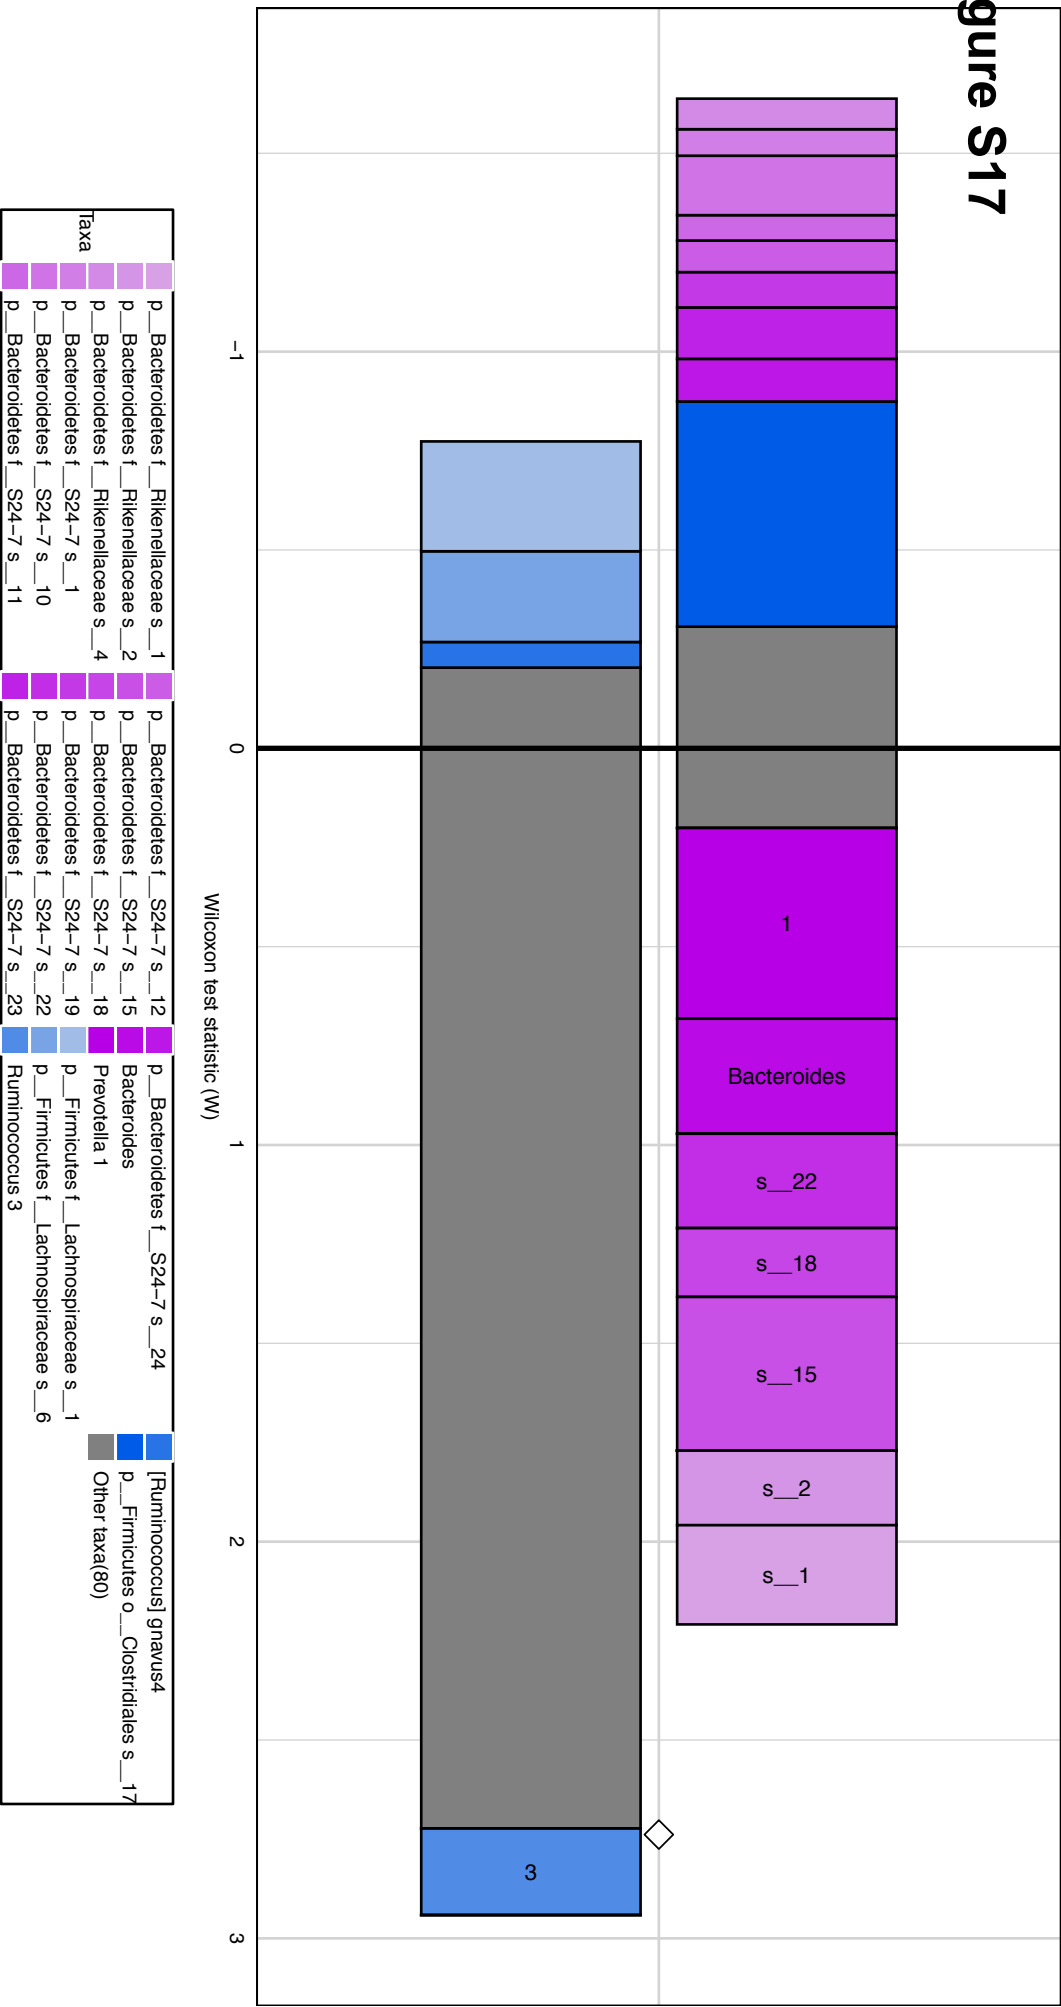

# Figure S18

k000740

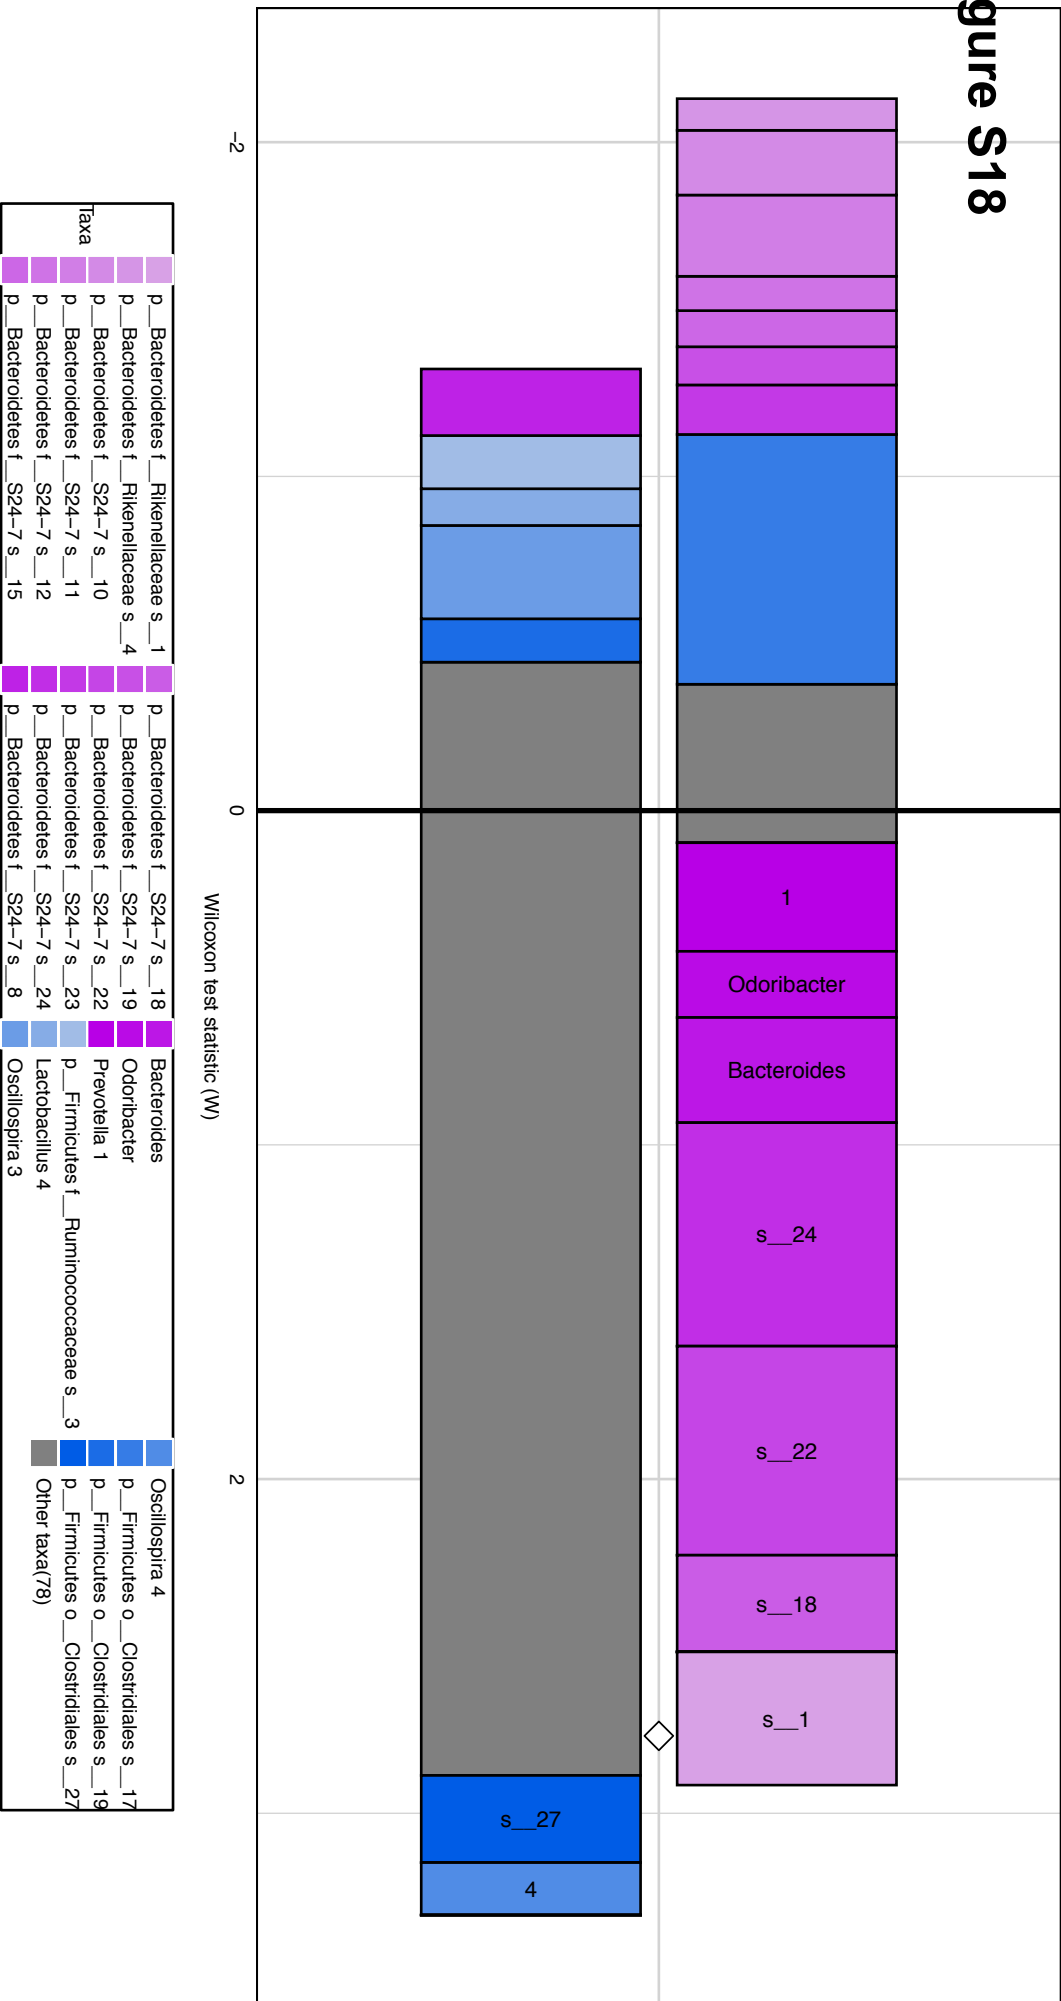

# Figure S19

ko00531

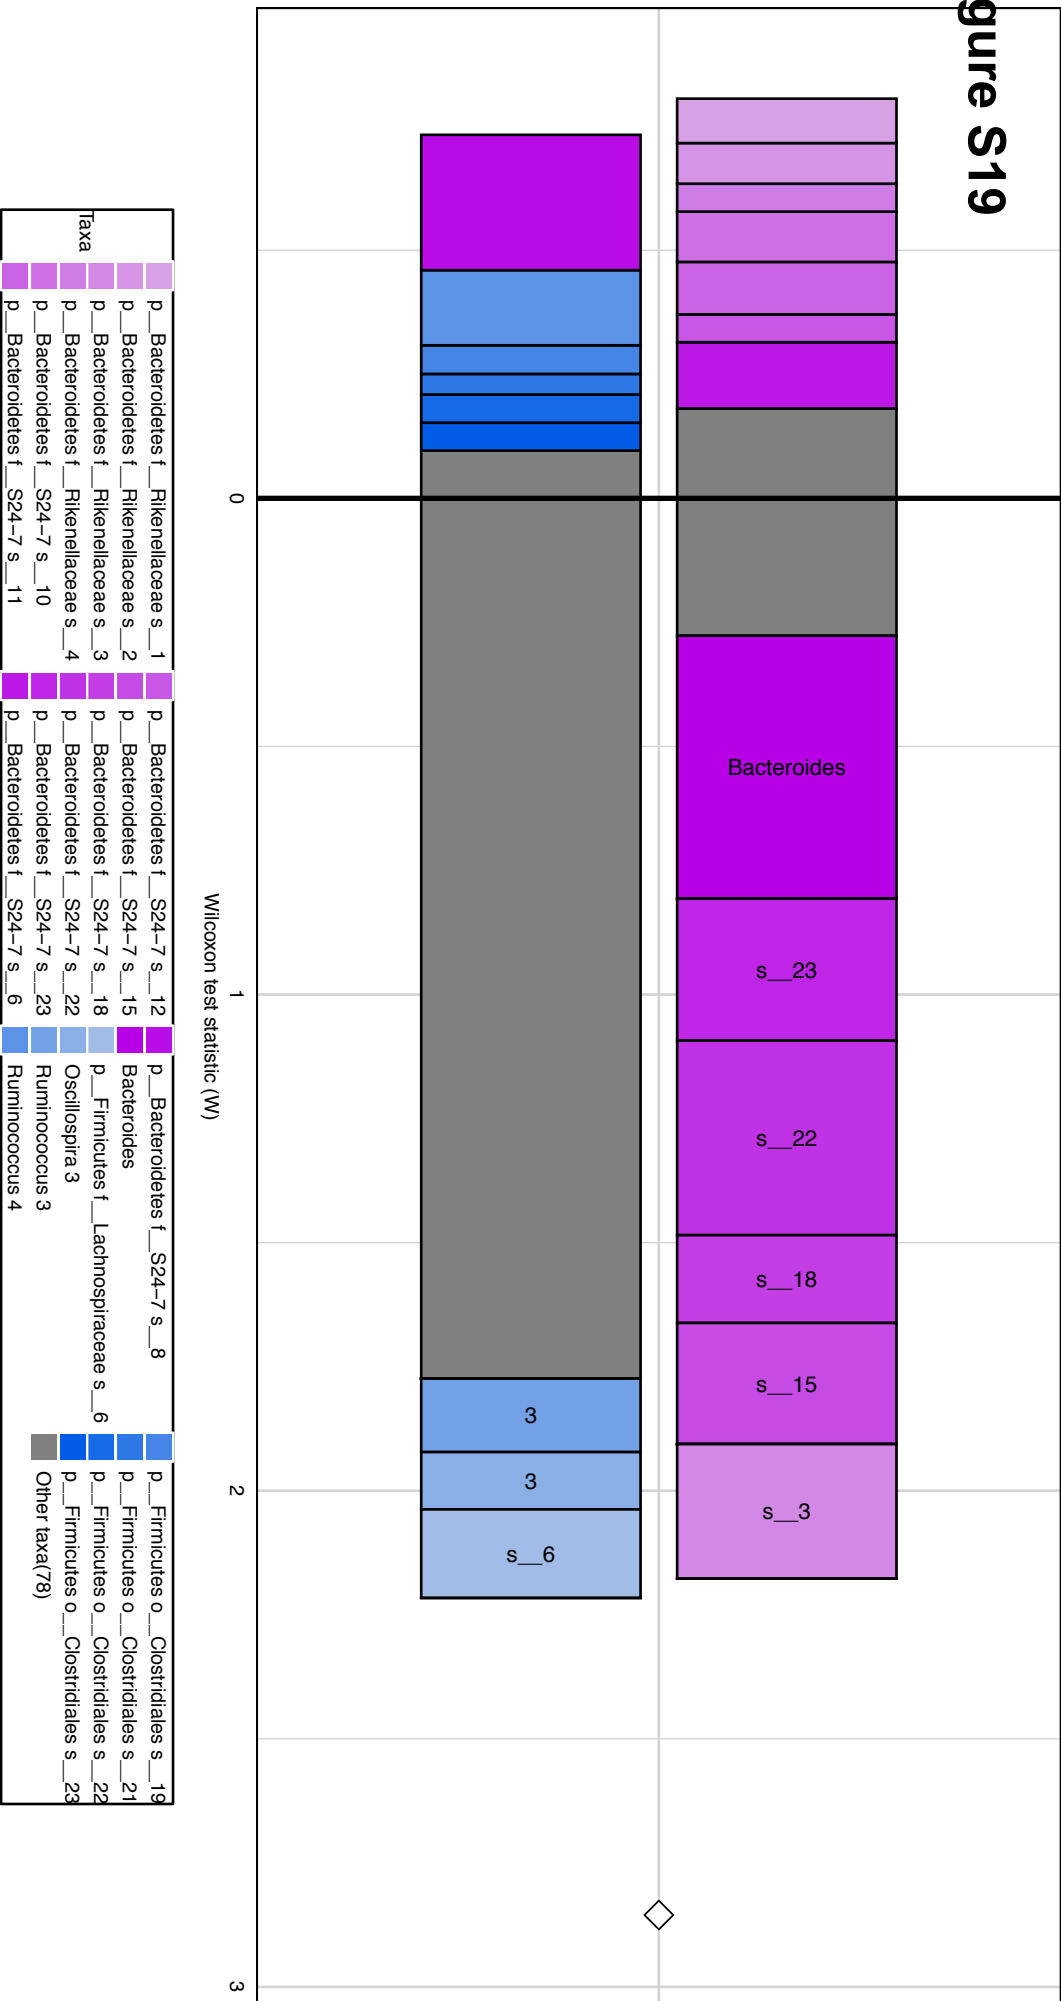





# Figure S21

K000623

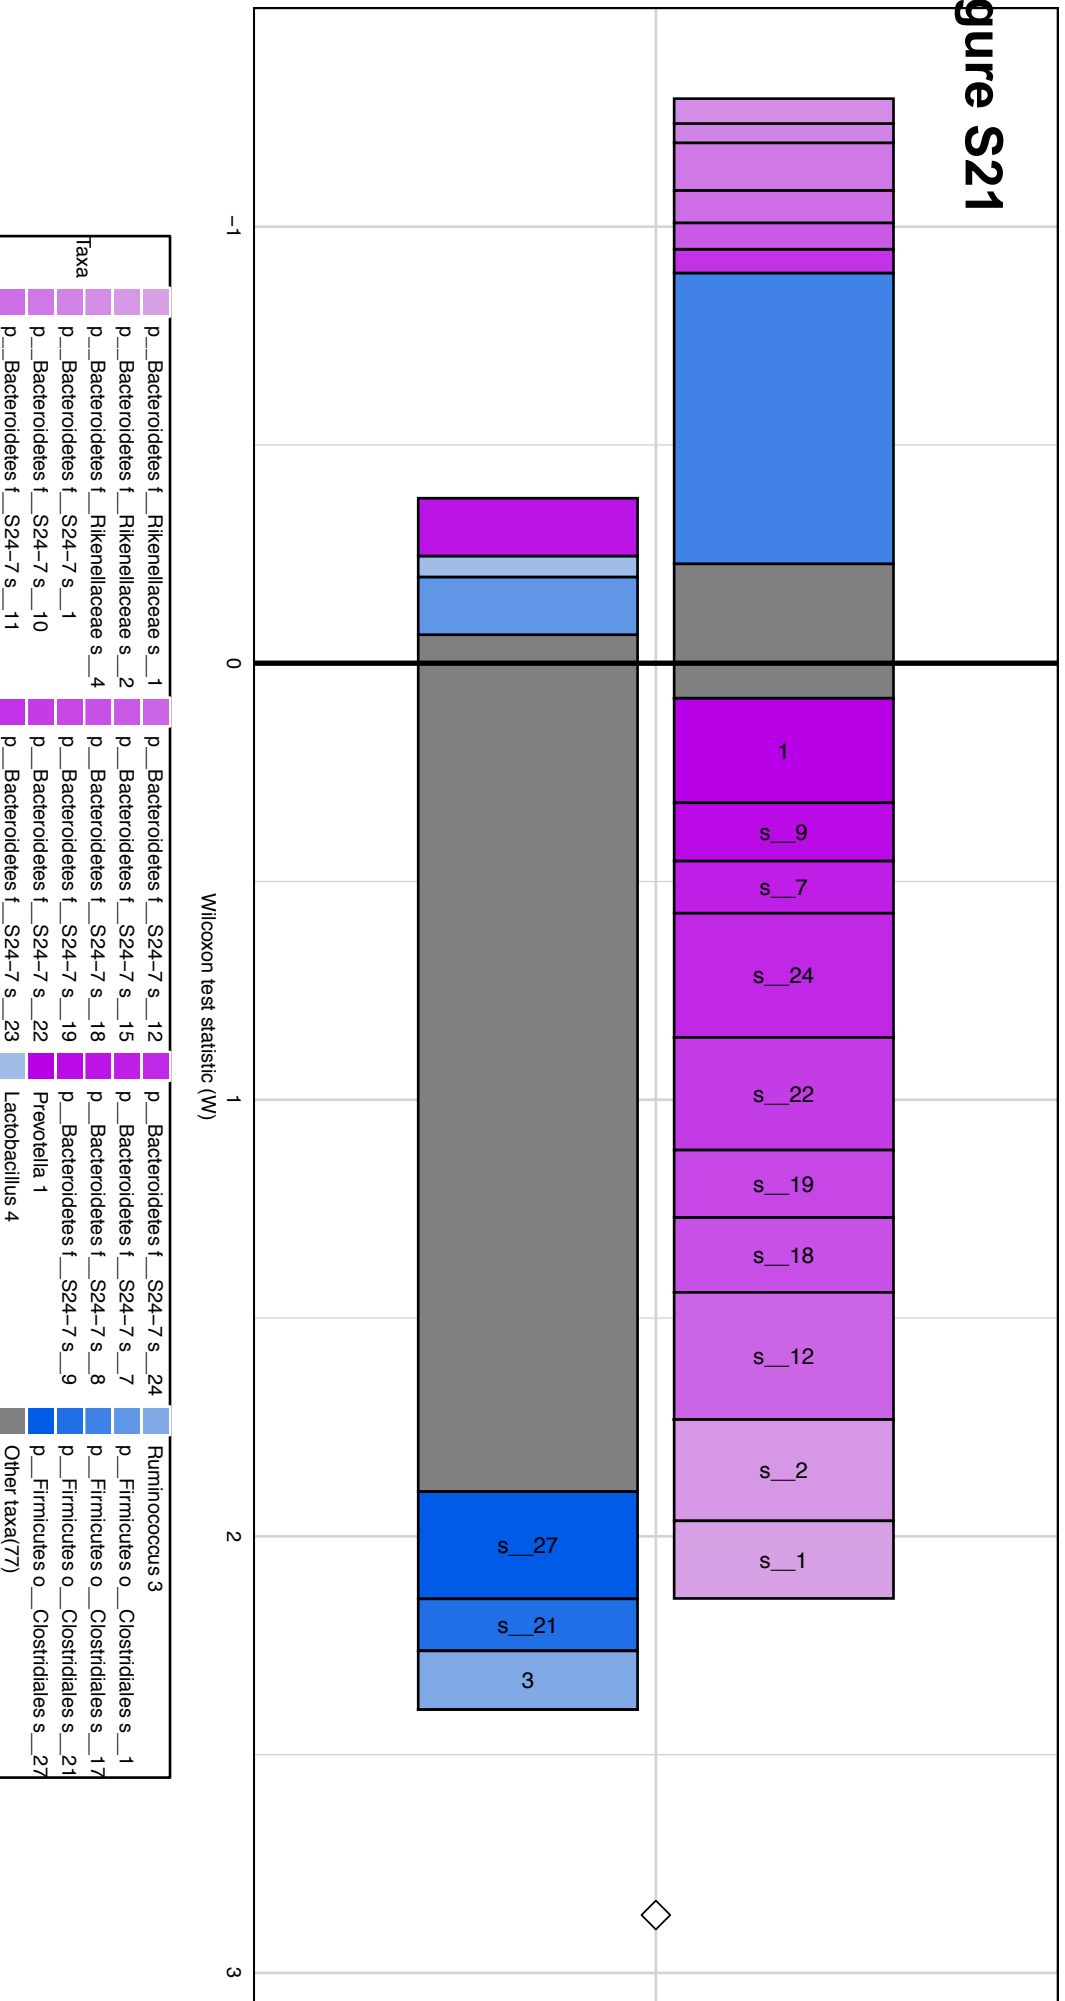

# Figure S22

K000604

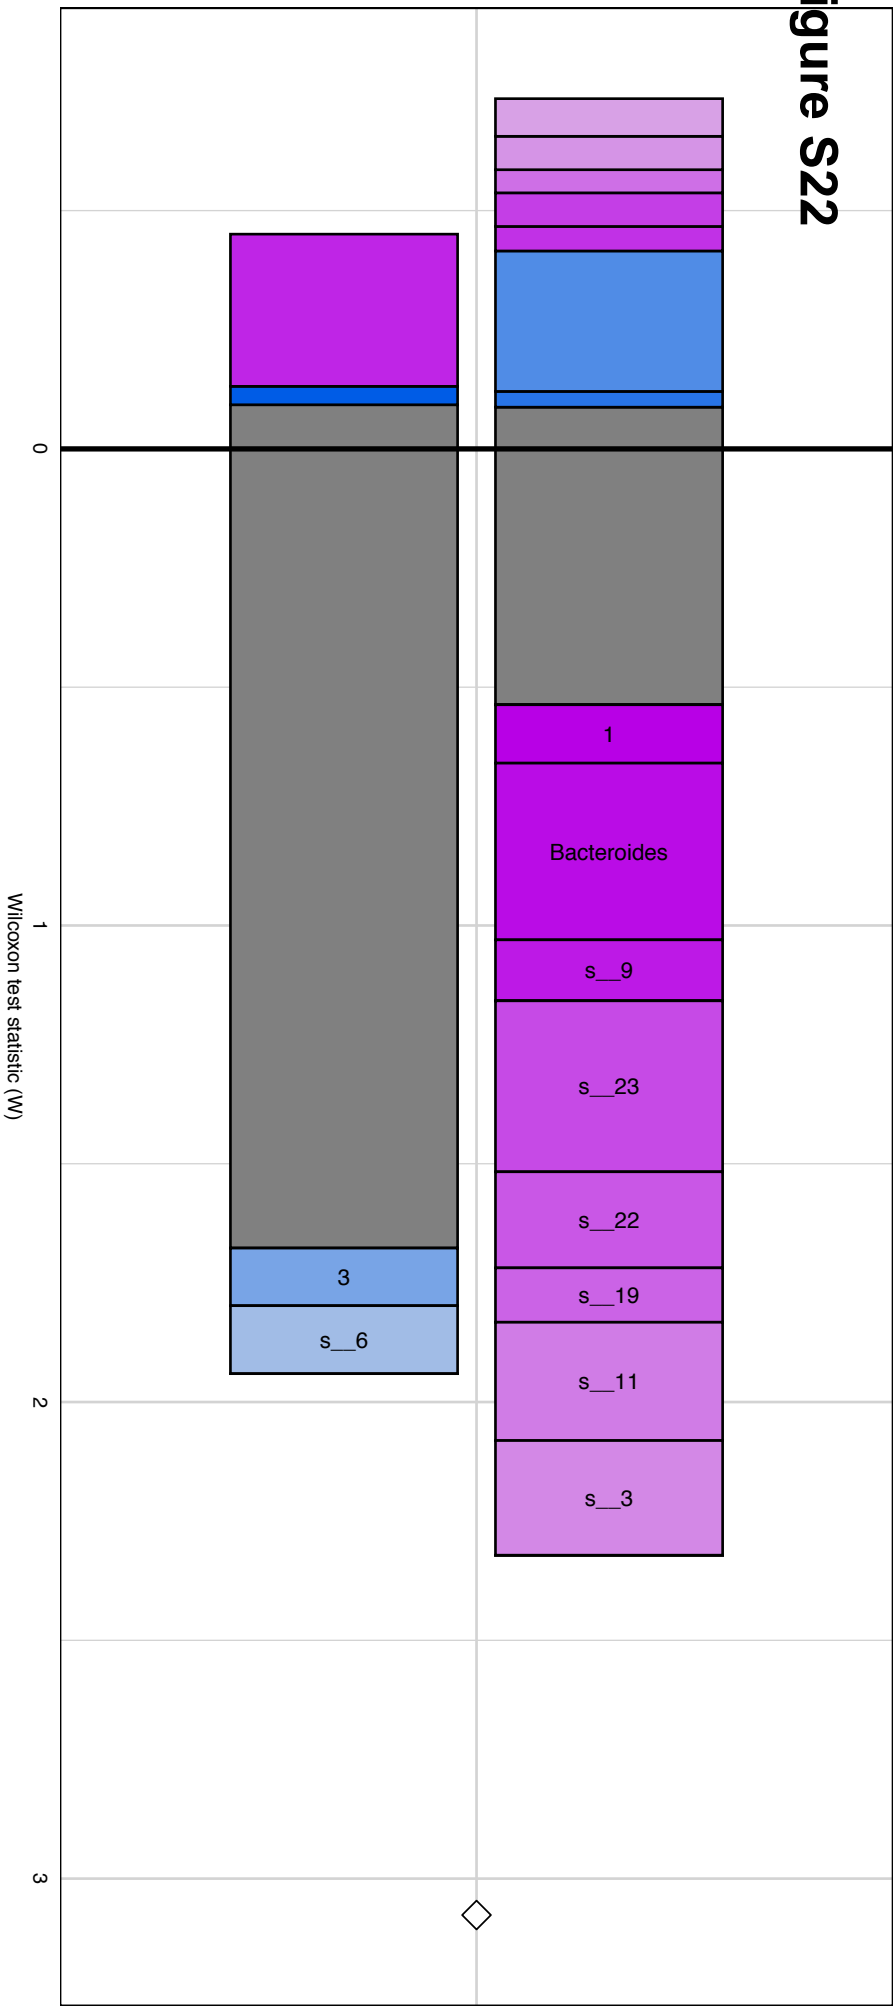

# Figure S23

k000780

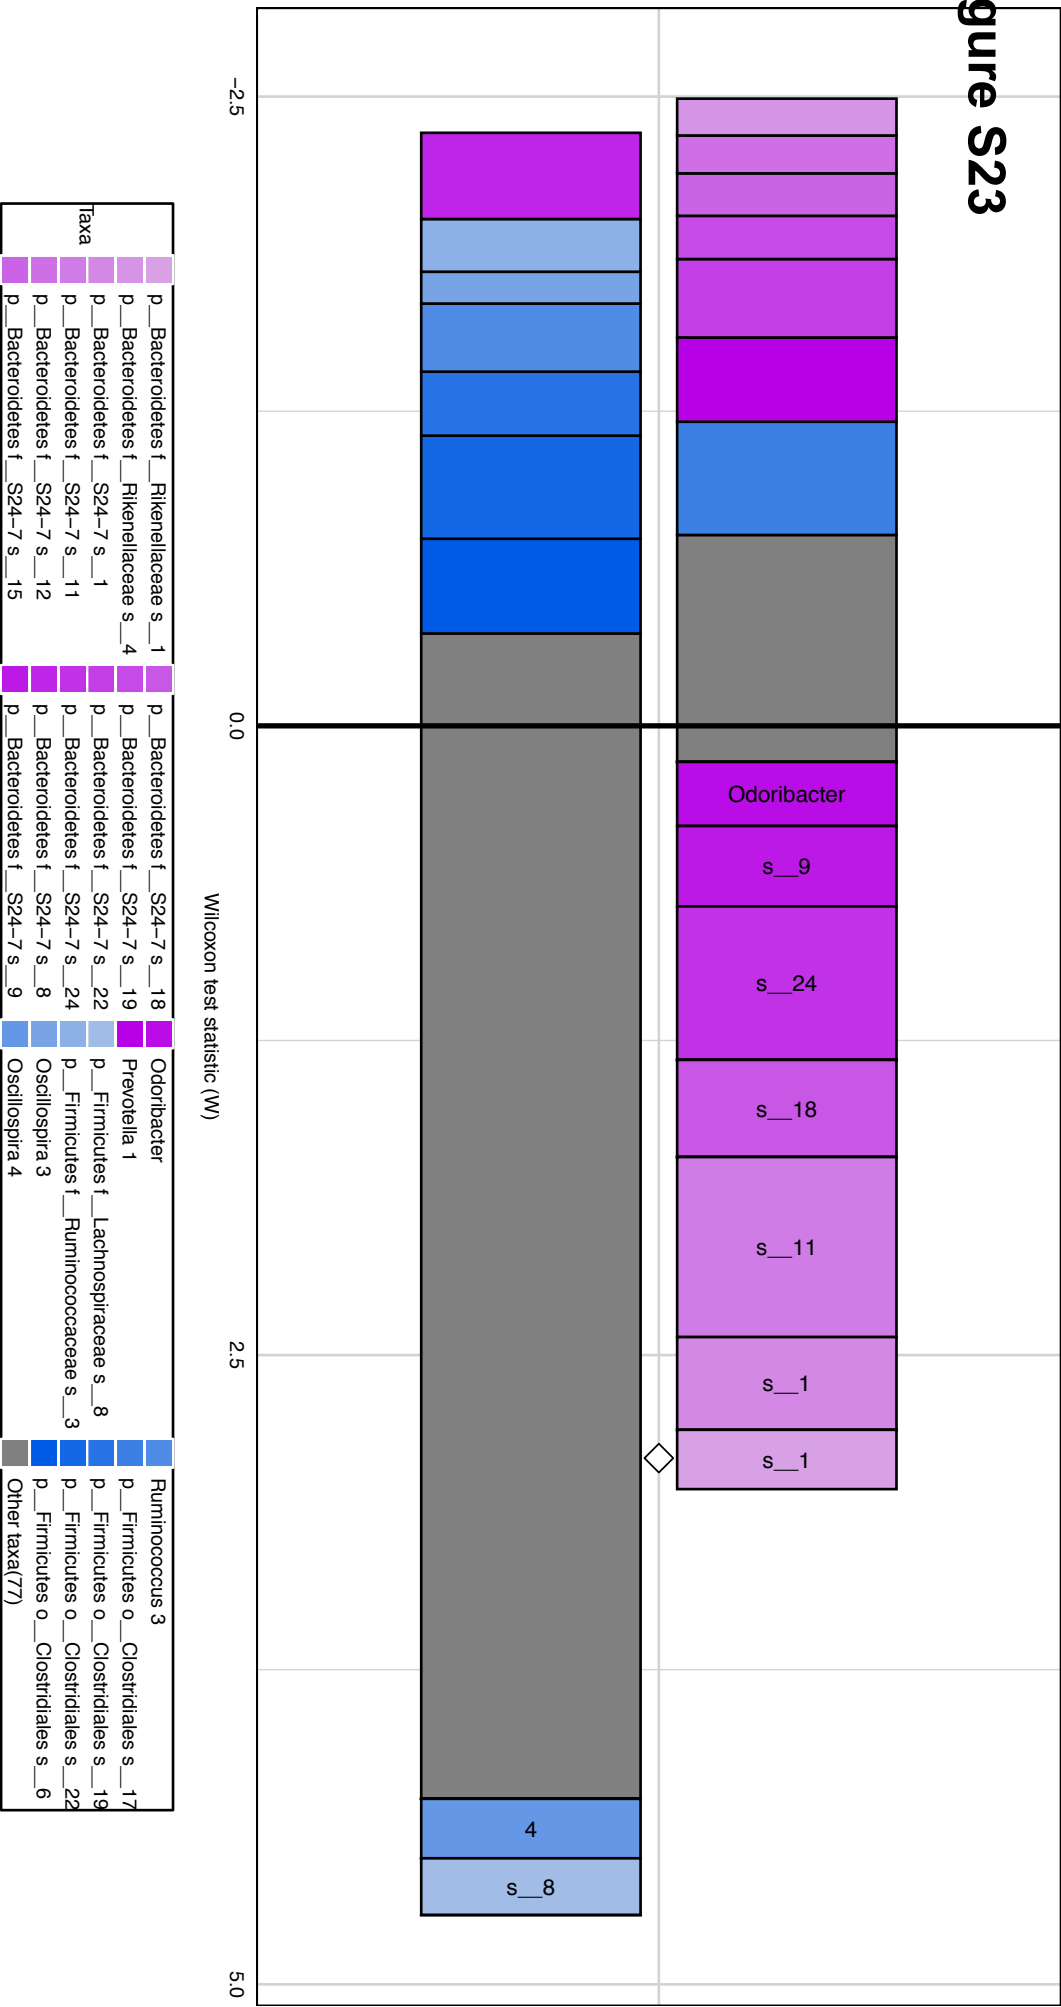



# Figure S25

k000785

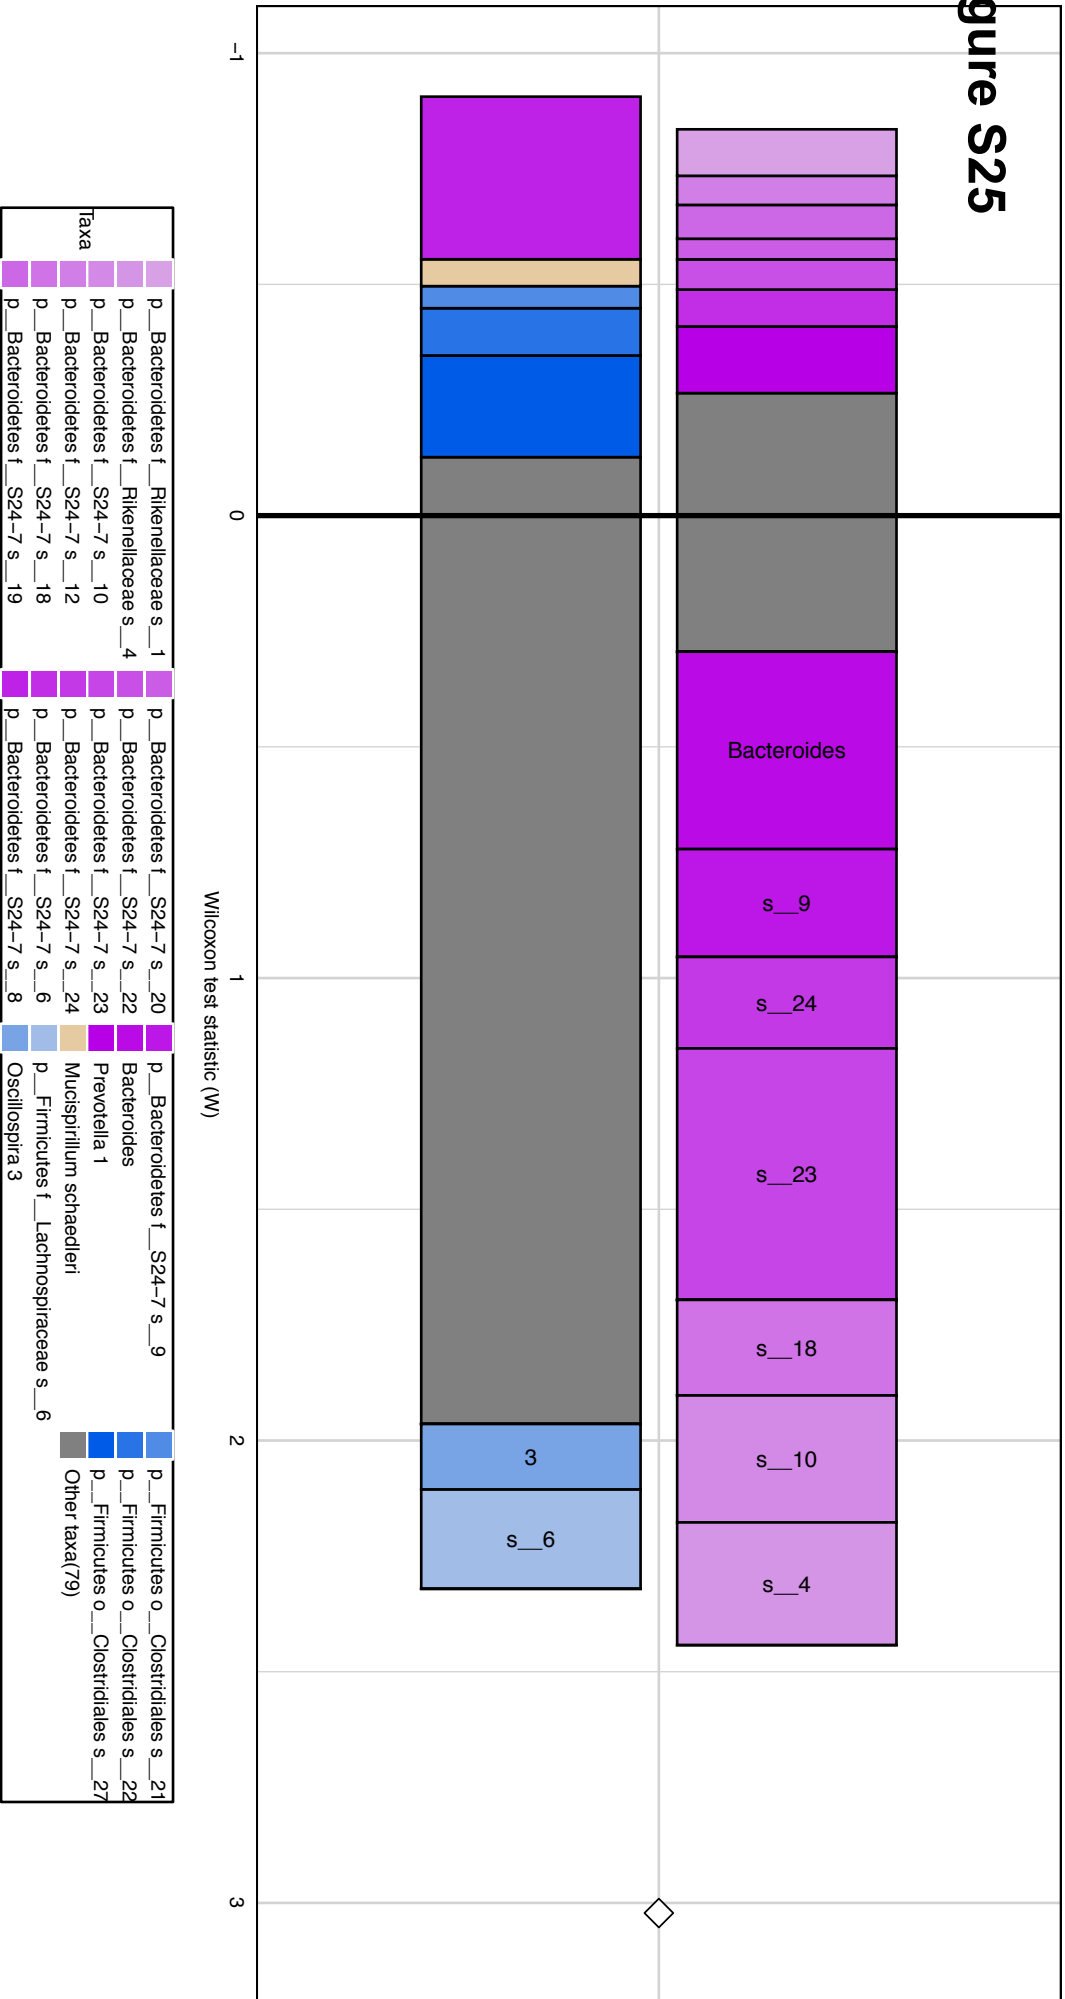

# Figure S26

ko03070

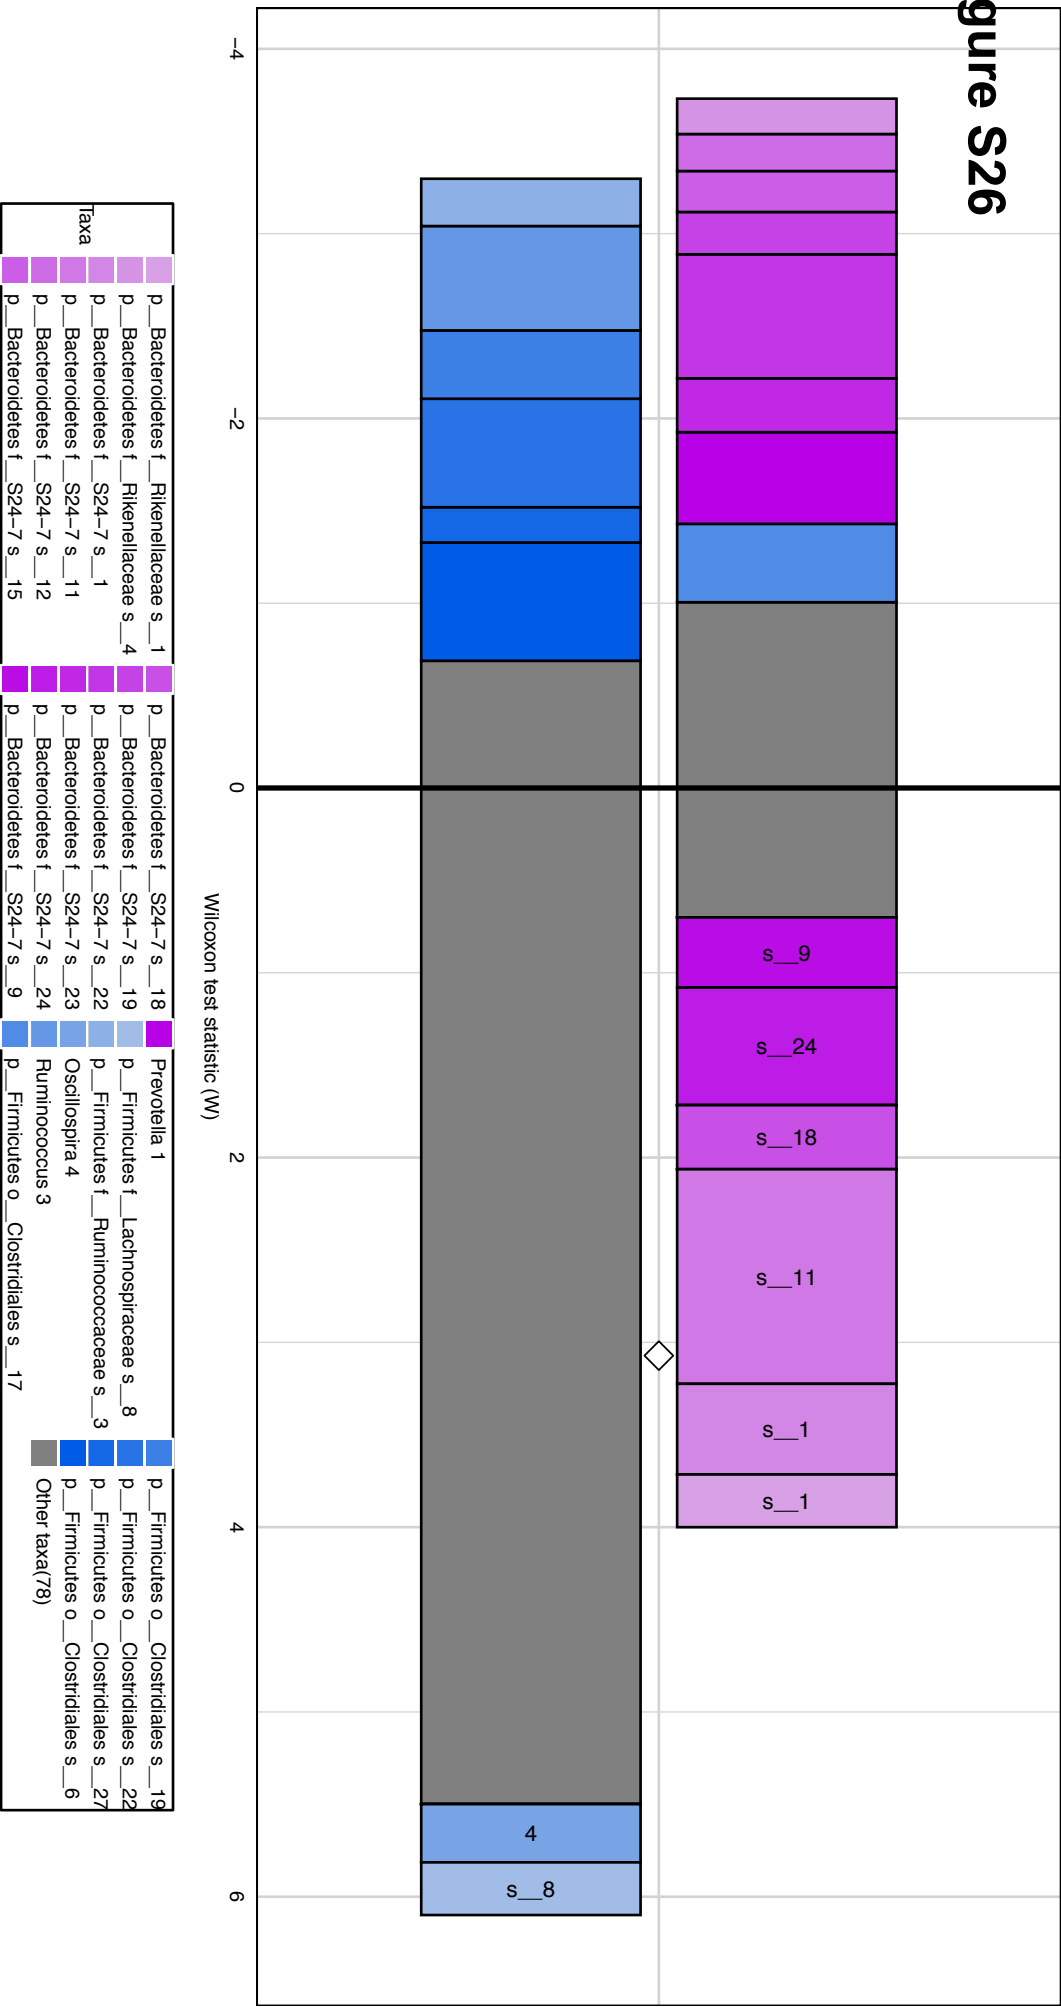







# Figure S29

k000670

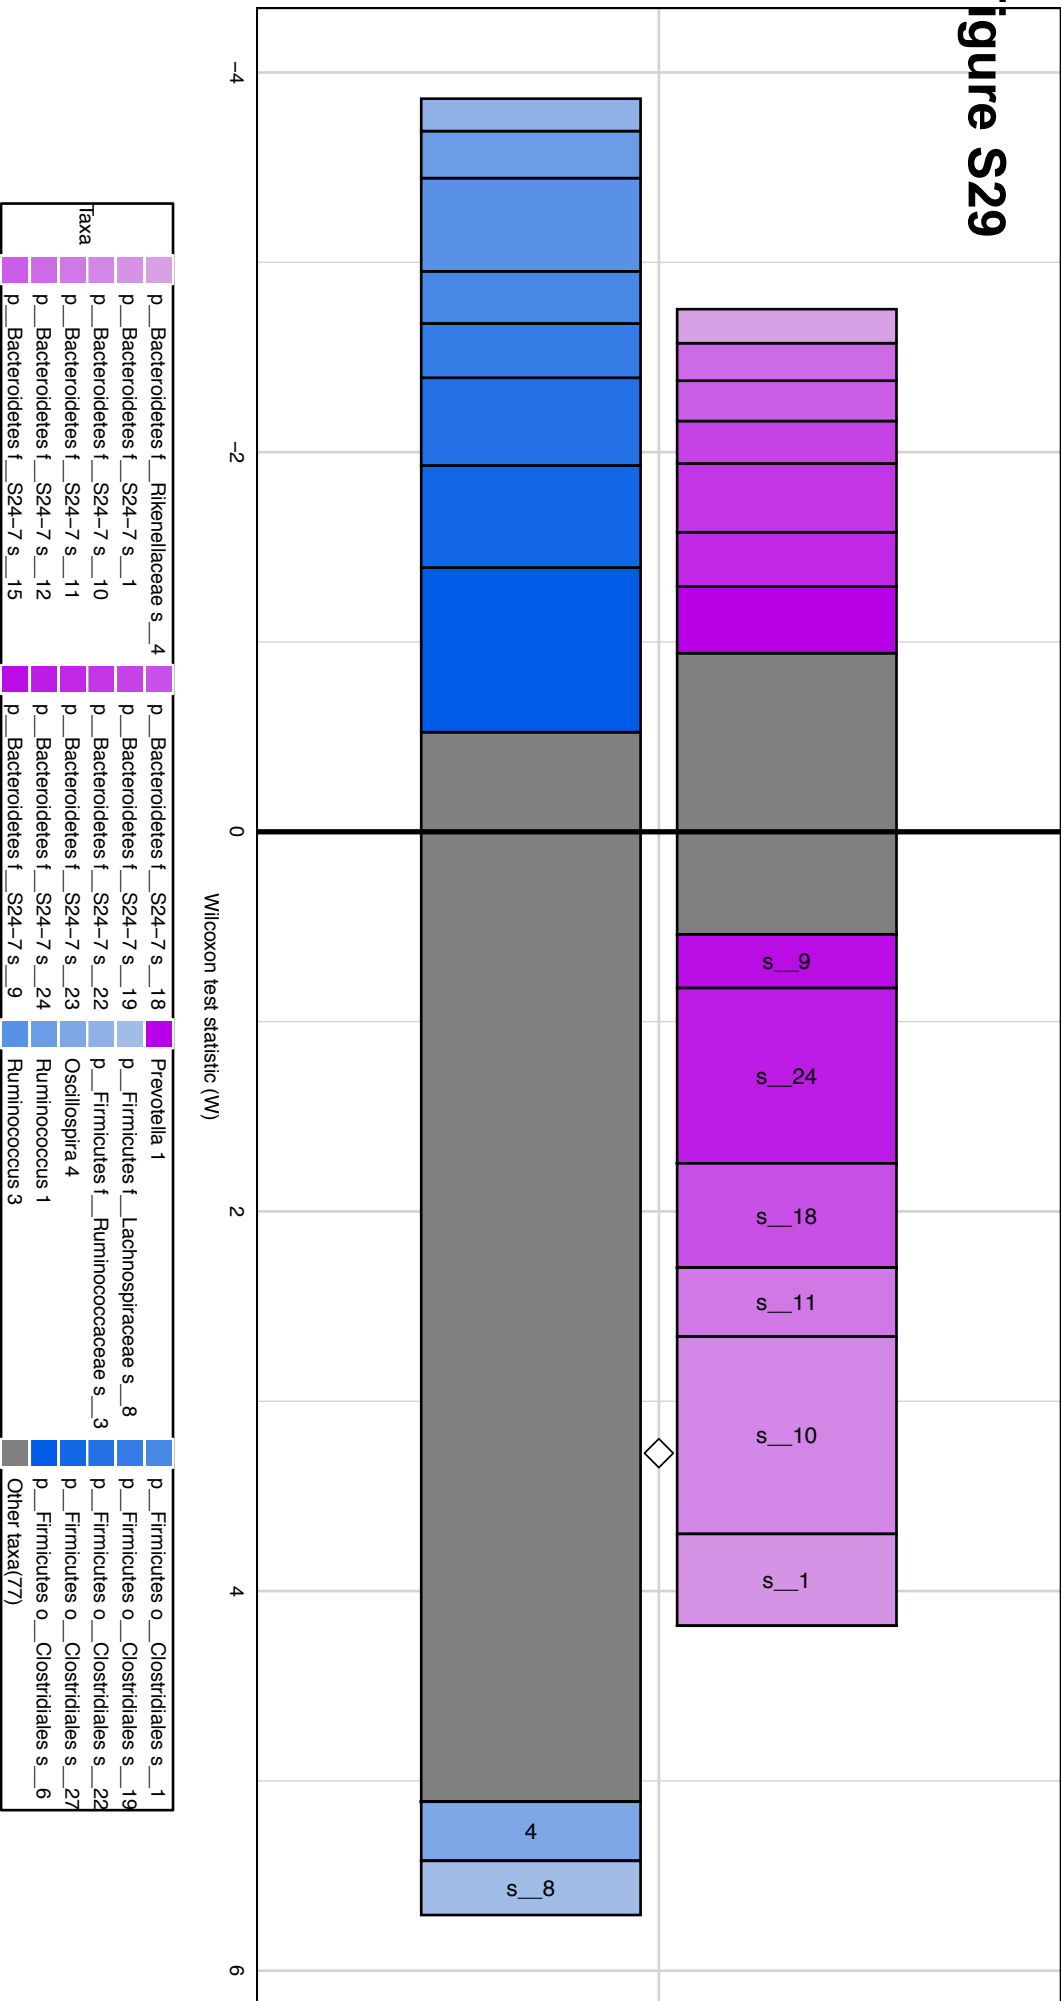

# Figure S30

ko04146

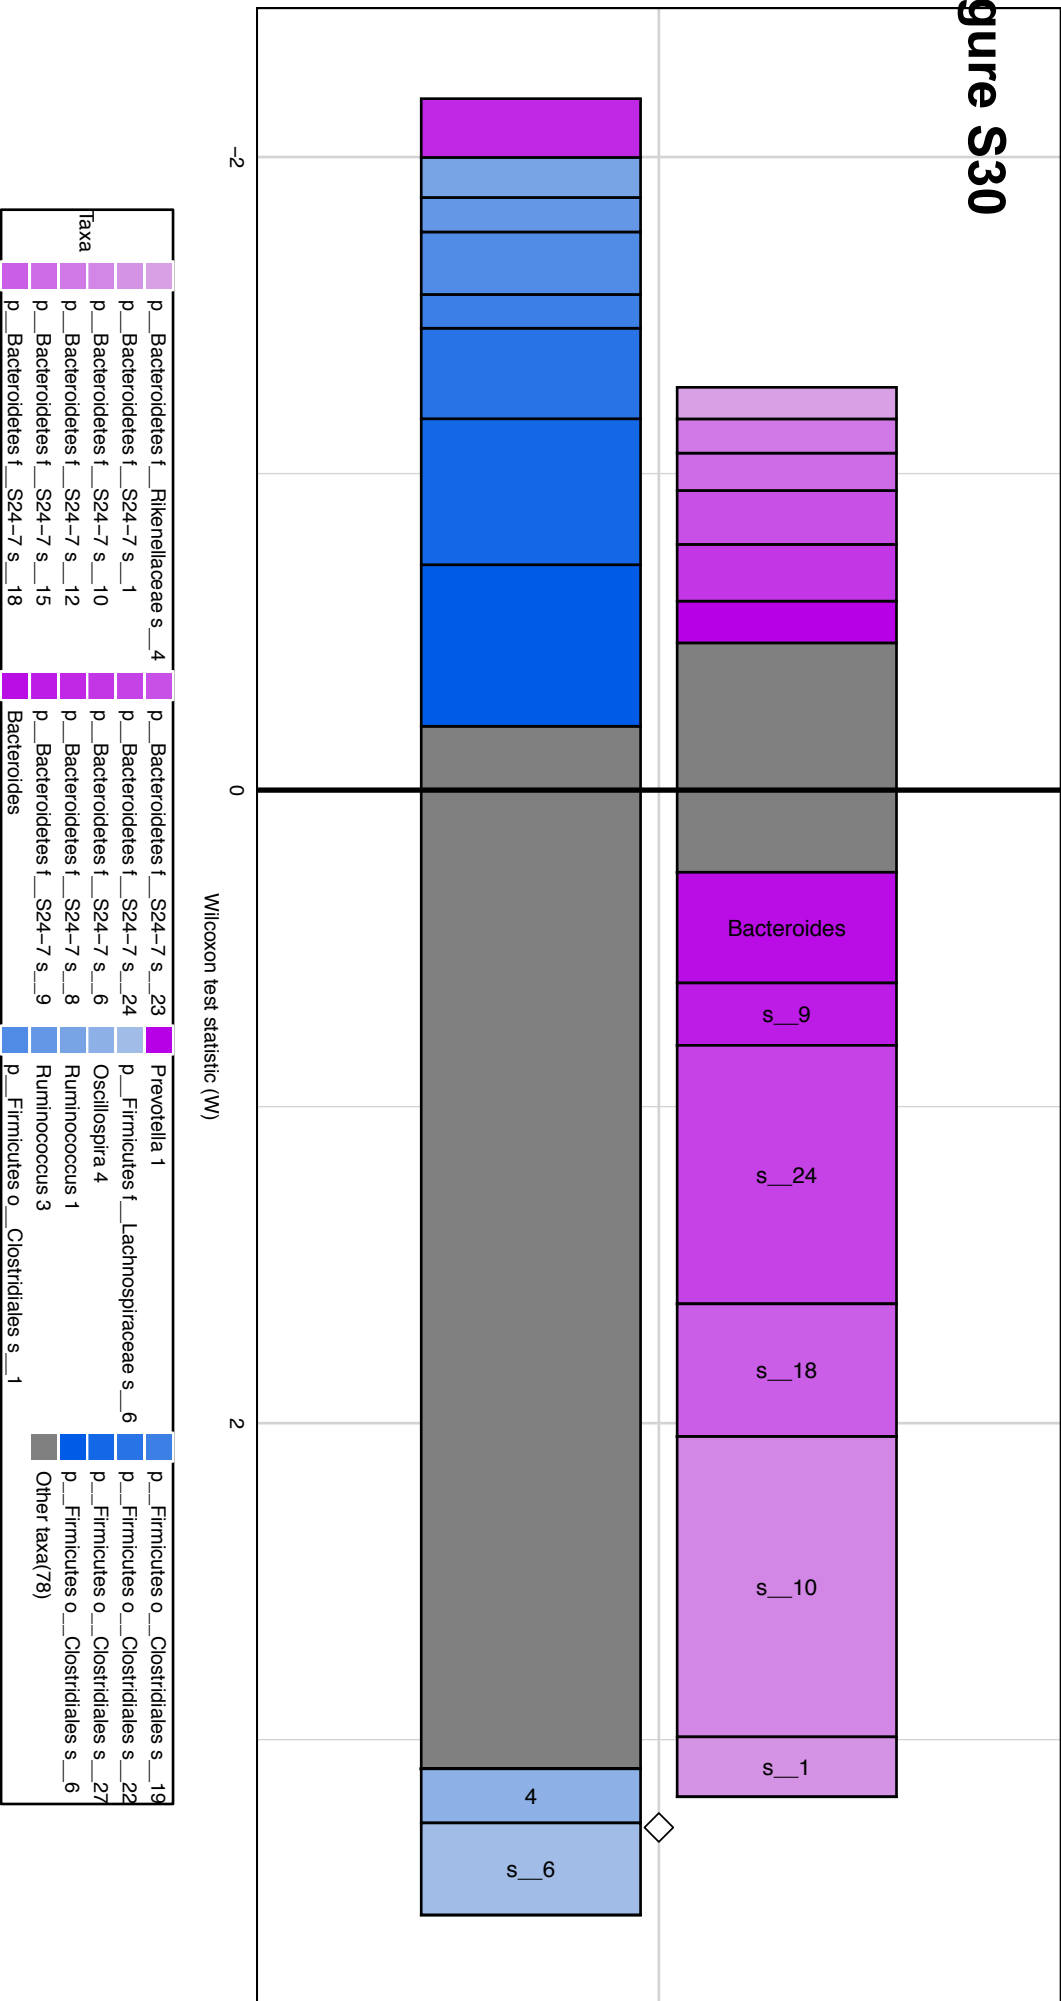

# Figure S31

ko00511

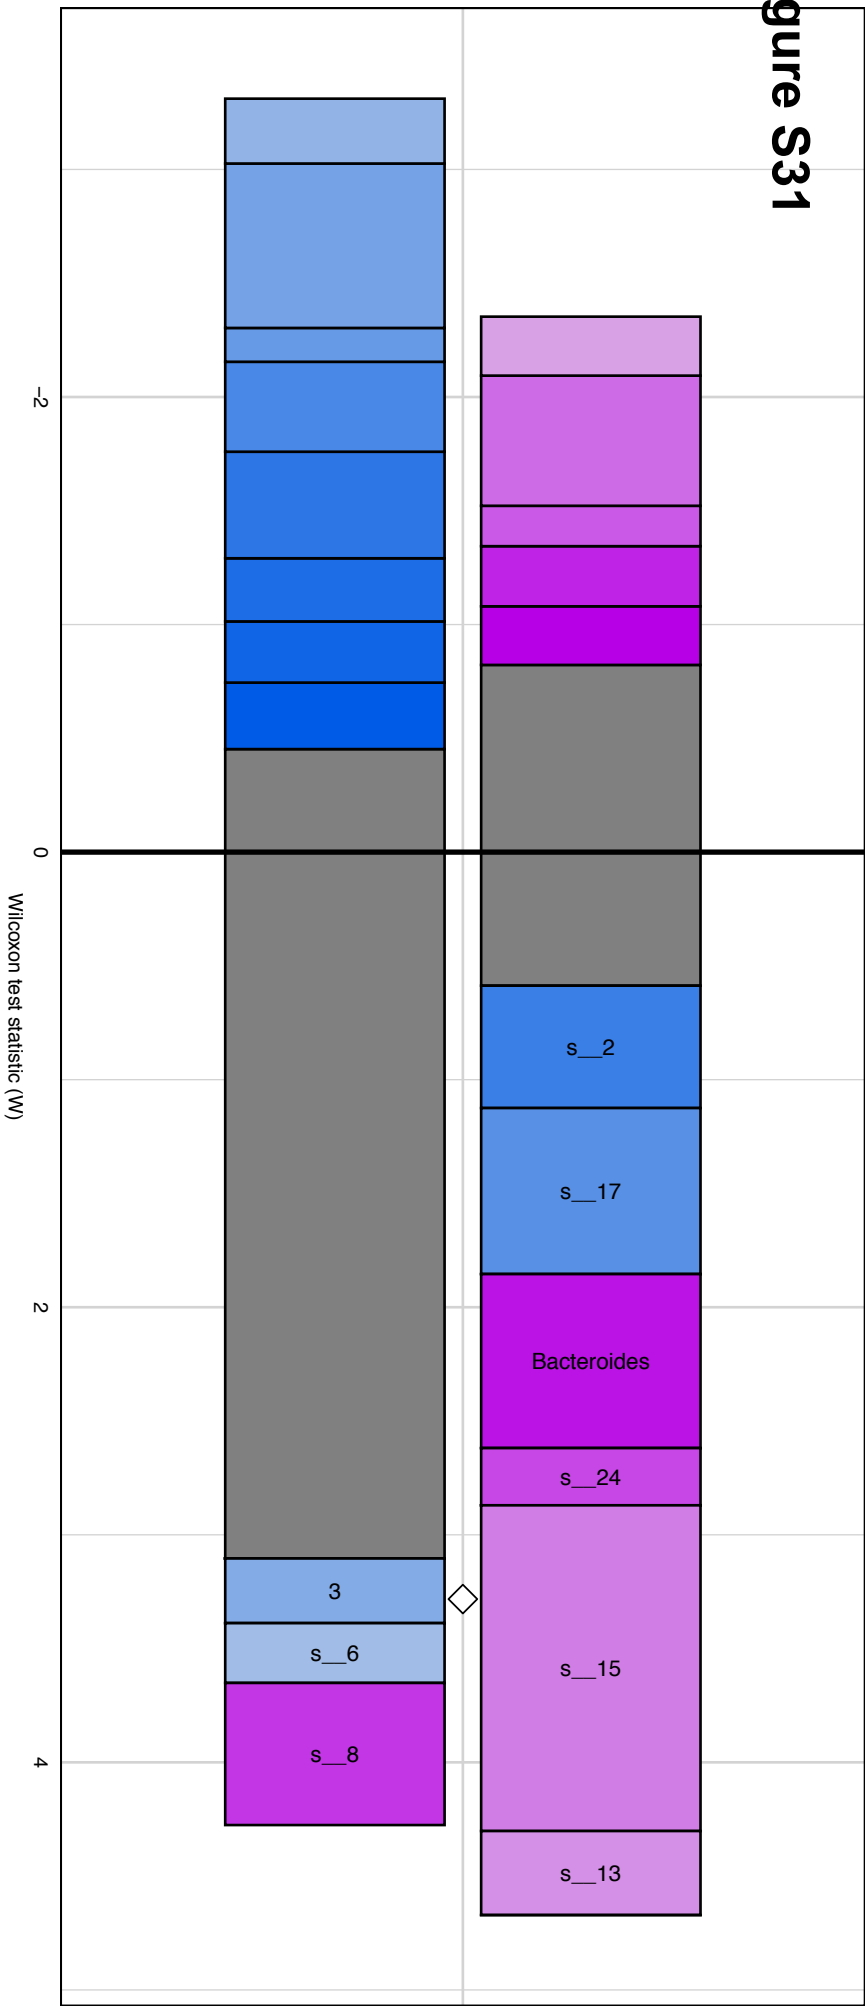

| Taxa                                  | Color        |
|---------------------------------------|--------------|
| p__Bacteroidetes f__S24-7 s__11       | Light Purple |
| p__Bacteroidetes f__S24-7 s__13       | Light Purple |
| p__Bacteroidetes f__S24-7 s__15       | Light Purple |
| p__Bacteroidetes f__S24-7 s__22       | Light Purple |
| p__Bacteroidetes f__S24-7 s__23       | Light Purple |
| p__Bacteroidetes f__S24-7 s__24       | Light Purple |
| p__Bacteroidetes f__S24-7 s__8        | Light Purple |
| p__Bacteroidetes f__S24-7 s__9        | Light Purple |
| Bacteroides                           | Light Purple |
| Prevotella 1                          | Light Purple |
| p__Firmicutes f__Lachnospiraceae s__6 | Light Purple |
| p__Firmicutes f__Ruminococcaceae s__1 | Light Purple |
| Ruminococcus 3                        | Light Purple |
| Ruminococcus 4                        | Light Purple |
| Ruminococcus 5                        | Light Purple |
| p__Firmicutes o__Clostridiales s__17  | Light Purple |
| p__Firmicutes o__Clostridiales s__19  | Light Purple |
| p__Firmicutes o__Clostridiales s__2   | Light Purple |
| p__Firmicutes o__Clostridiales s__22  | Light Purple |
| p__Firmicutes o__Clostridiales s__23  | Light Purple |
| p__Firmicutes o__Clostridiales s__27  | Light Purple |
| p__Firmicutes o__Clostridiales s__8   | Light Purple |
| Other taxa(78)                        | Light Purple |
| p__Bacteroidetes f__S24-7 s__11       | Blue         |
| p__Bacteroidetes f__S24-7 s__13       | Blue         |
| p__Bacteroidetes f__S24-7 s__15       | Blue         |
| p__Bacteroidetes f__S24-7 s__22       | Blue         |
| p__Bacteroidetes f__S24-7 s__23       | Blue         |
| p__Bacteroidetes f__S24-7 s__24       | Blue         |
| p__Bacteroidetes f__S24-7 s__8        | Blue         |
| p__Bacteroidetes f__S24-7 s__9        | Blue         |
| Bacteroides                           | Blue         |
| Prevotella 1                          | Blue         |
| p__Firmicutes f__Lachnospiraceae s__6 | Blue         |
| p__Firmicutes f__Ruminococcaceae s__1 | Blue         |
| Ruminococcus 3                        | Blue         |
| Ruminococcus 4                        | Blue         |
| Ruminococcus 5                        | Blue         |
| p__Firmicutes o__Clostridiales s__17  | Blue         |
| p__Firmicutes o__Clostridiales s__19  | Blue         |
| p__Firmicutes o__Clostridiales s__2   | Blue         |
| p__Firmicutes o__Clostridiales s__22  | Blue         |
| p__Firmicutes o__Clostridiales s__23  | Blue         |
| p__Firmicutes o__Clostridiales s__27  | Blue         |
| p__Firmicutes o__Clostridiales s__8   | Blue         |
| Other taxa(78)                        | Blue         |

# Figure S32

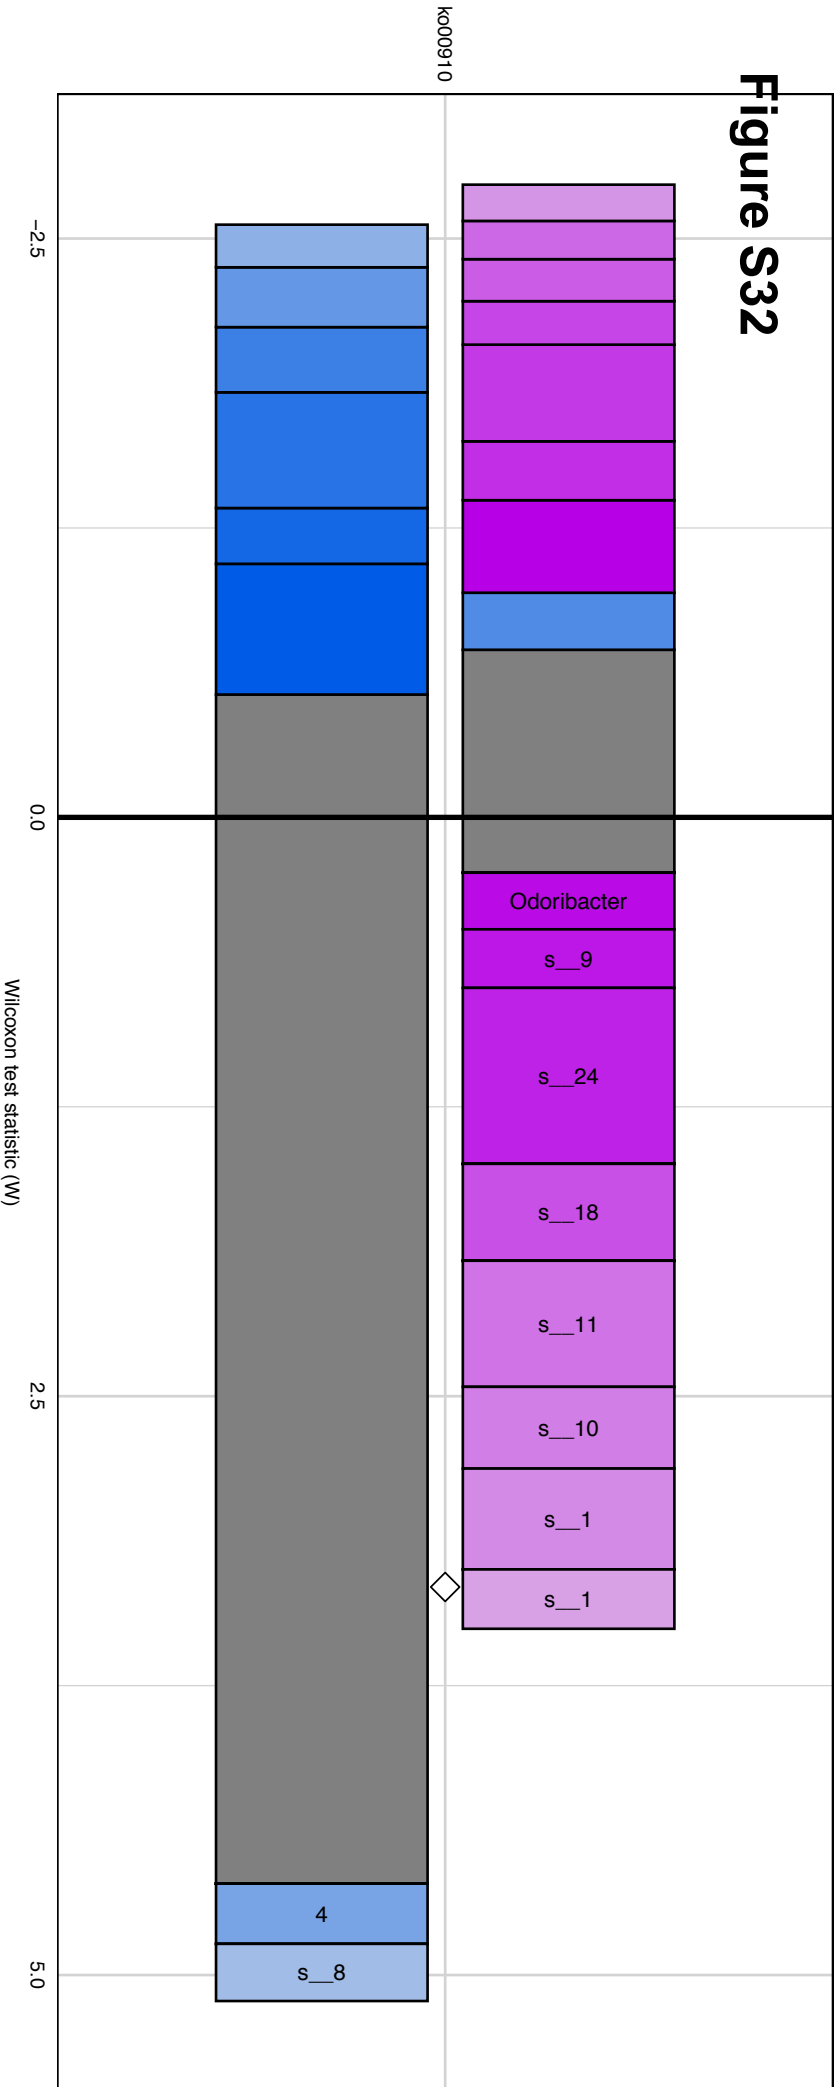



# Figure S34

K000540

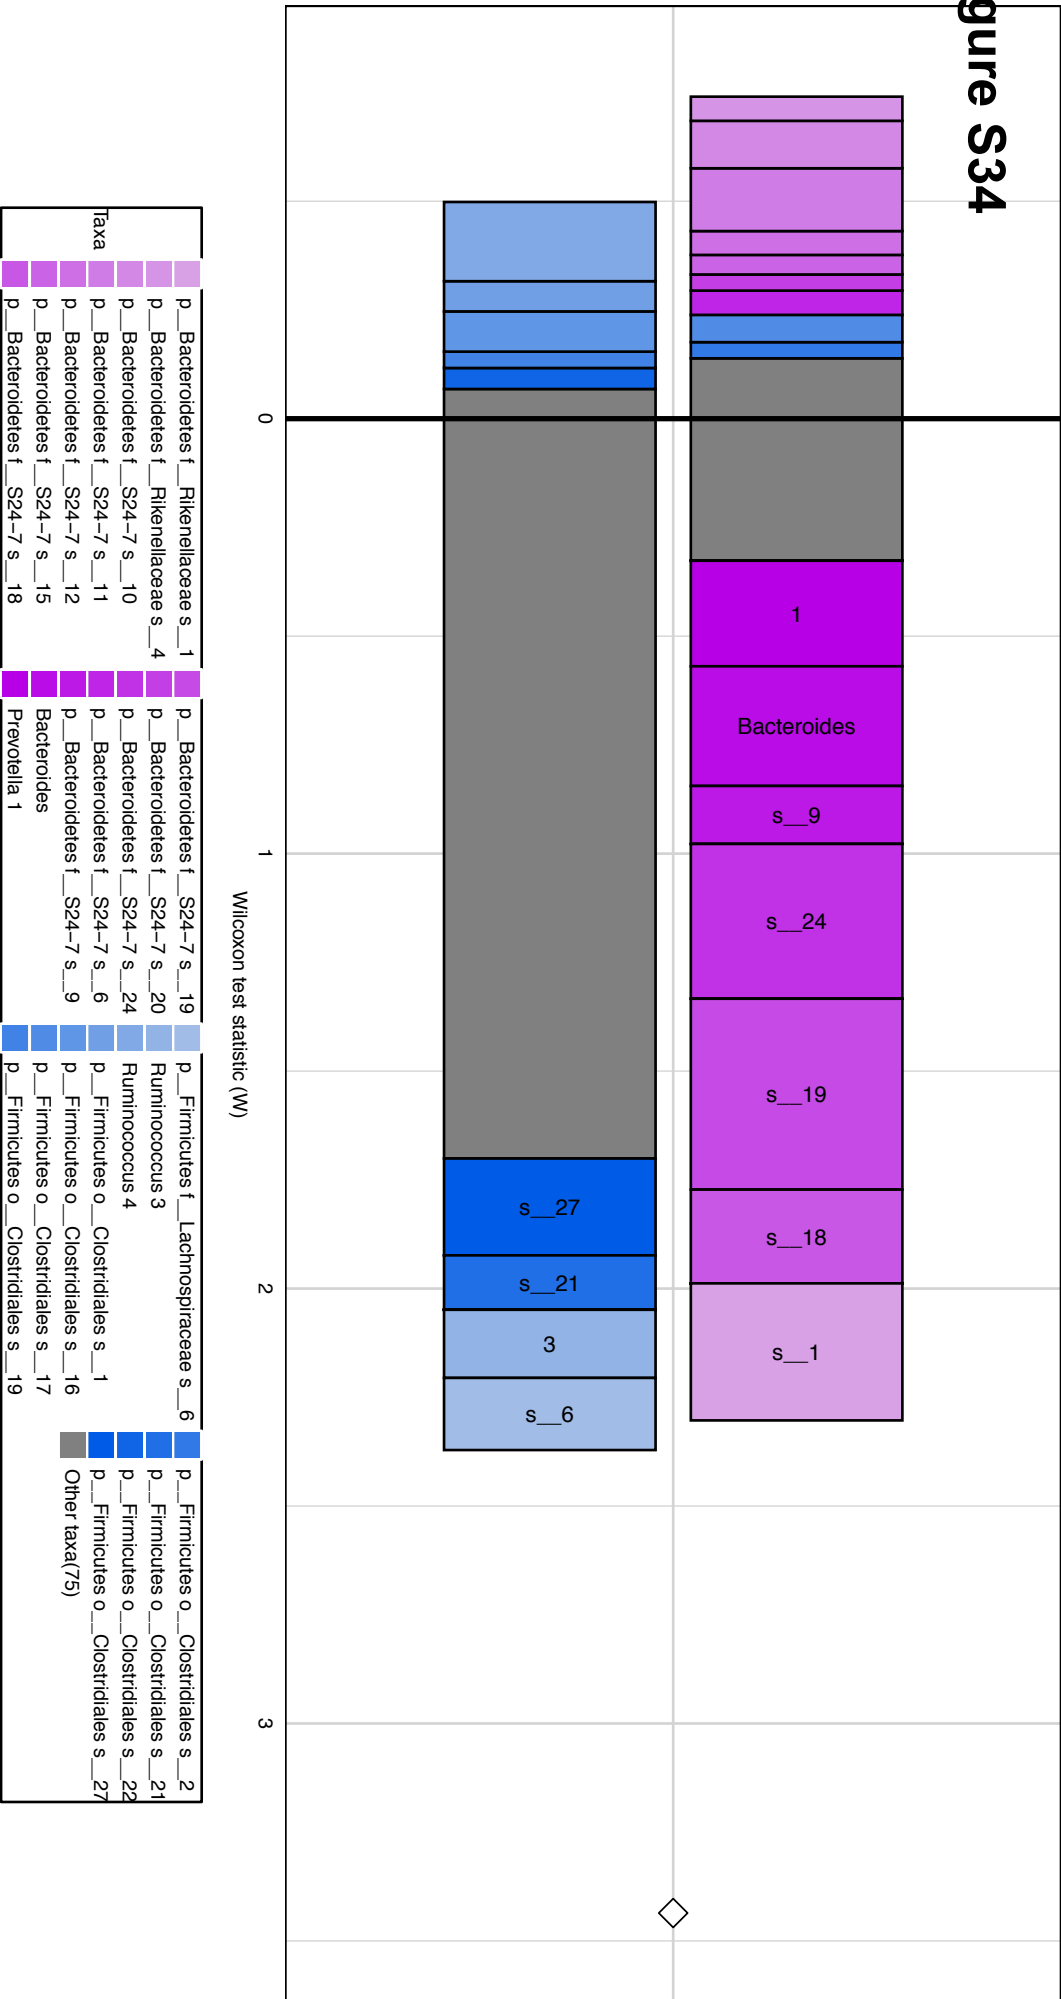

# Figure S35

ko03018

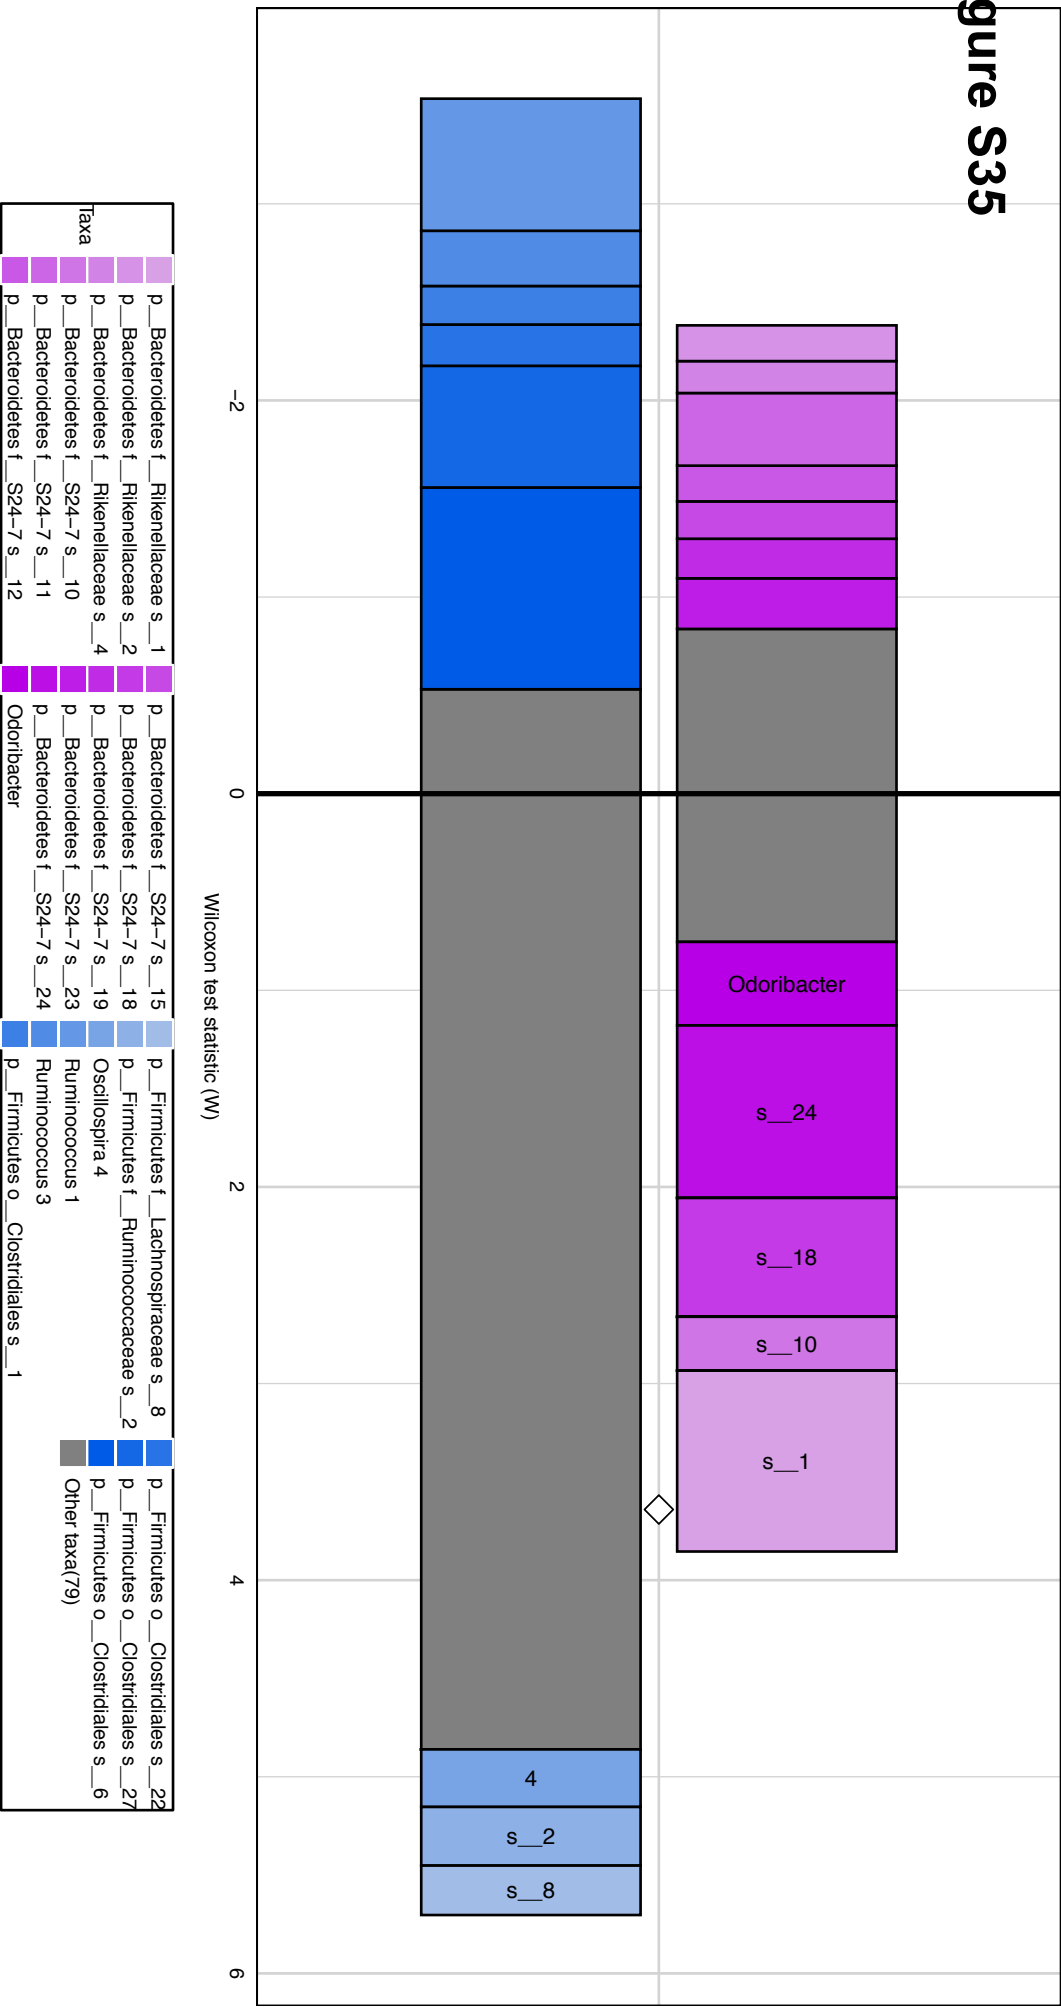



# Figure S36

k000790

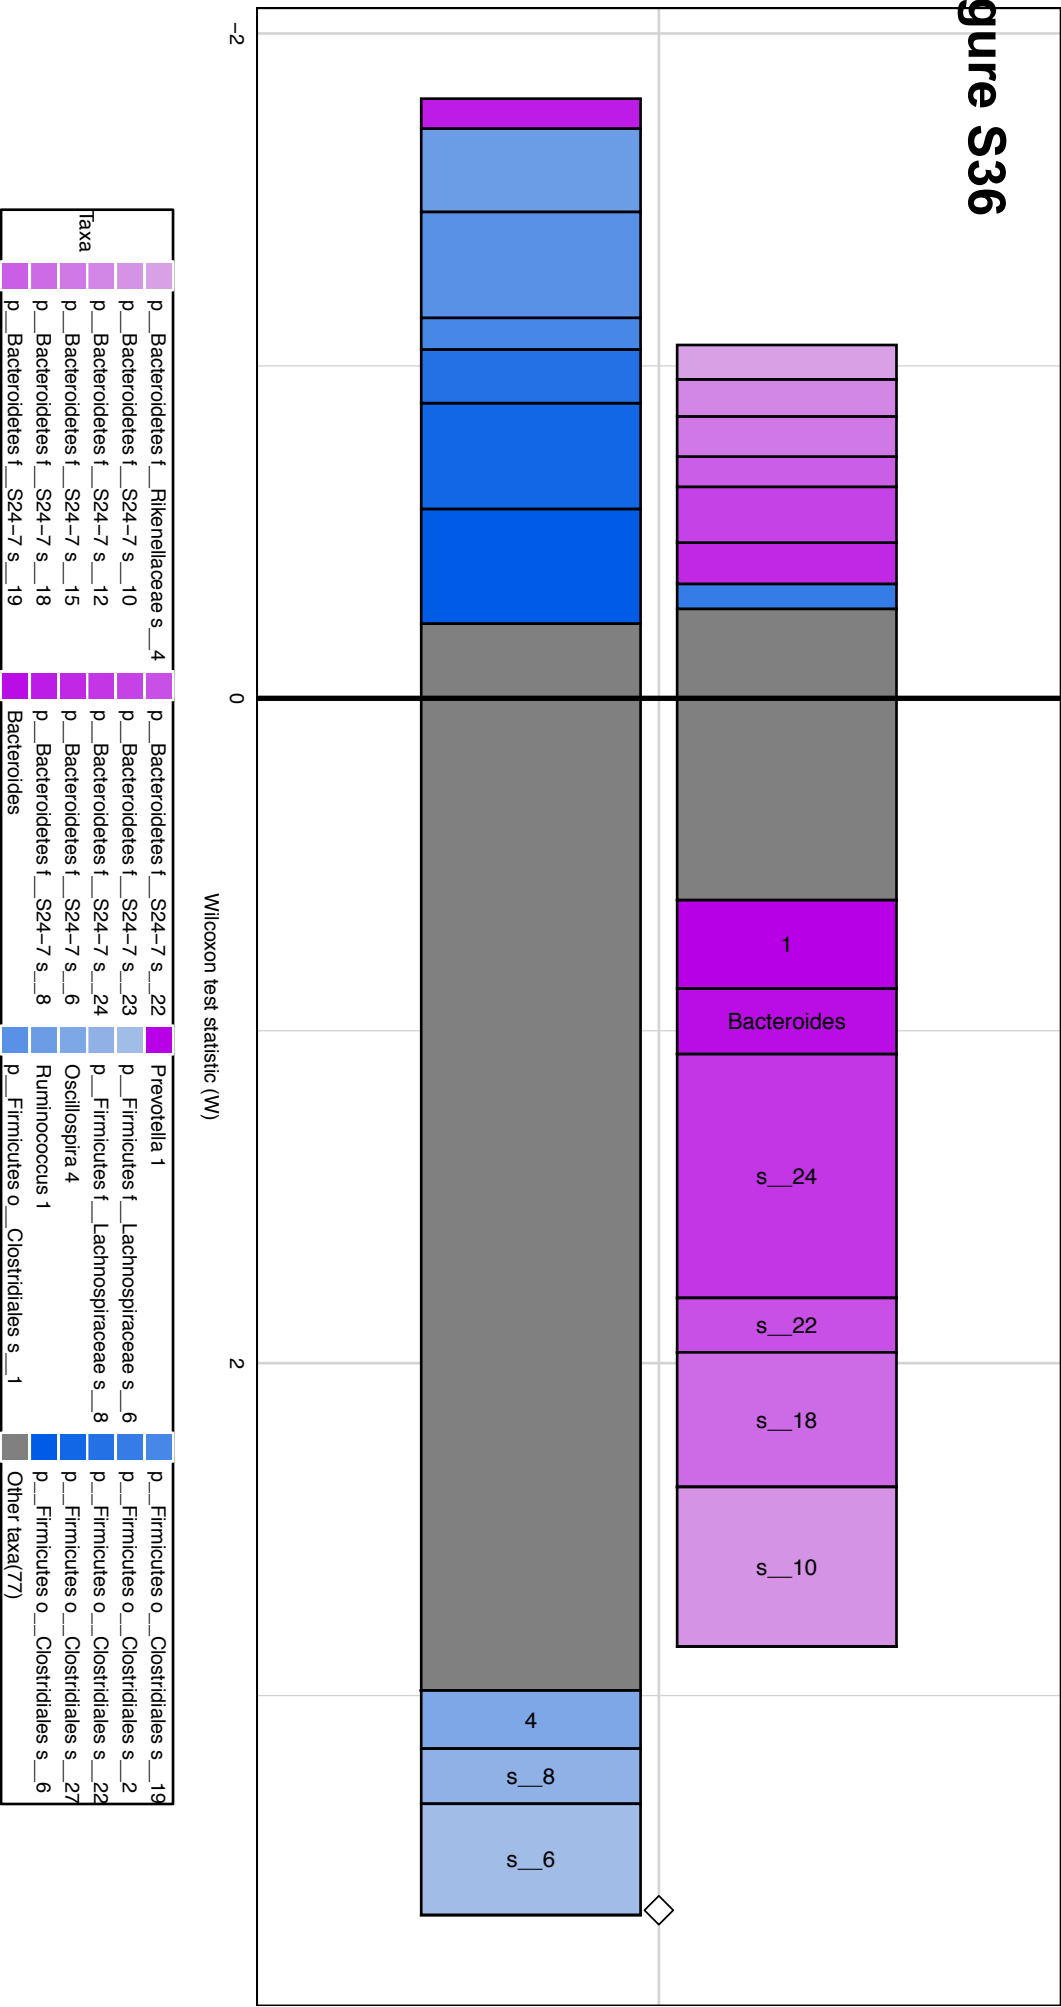



# Figure S38

ko00521

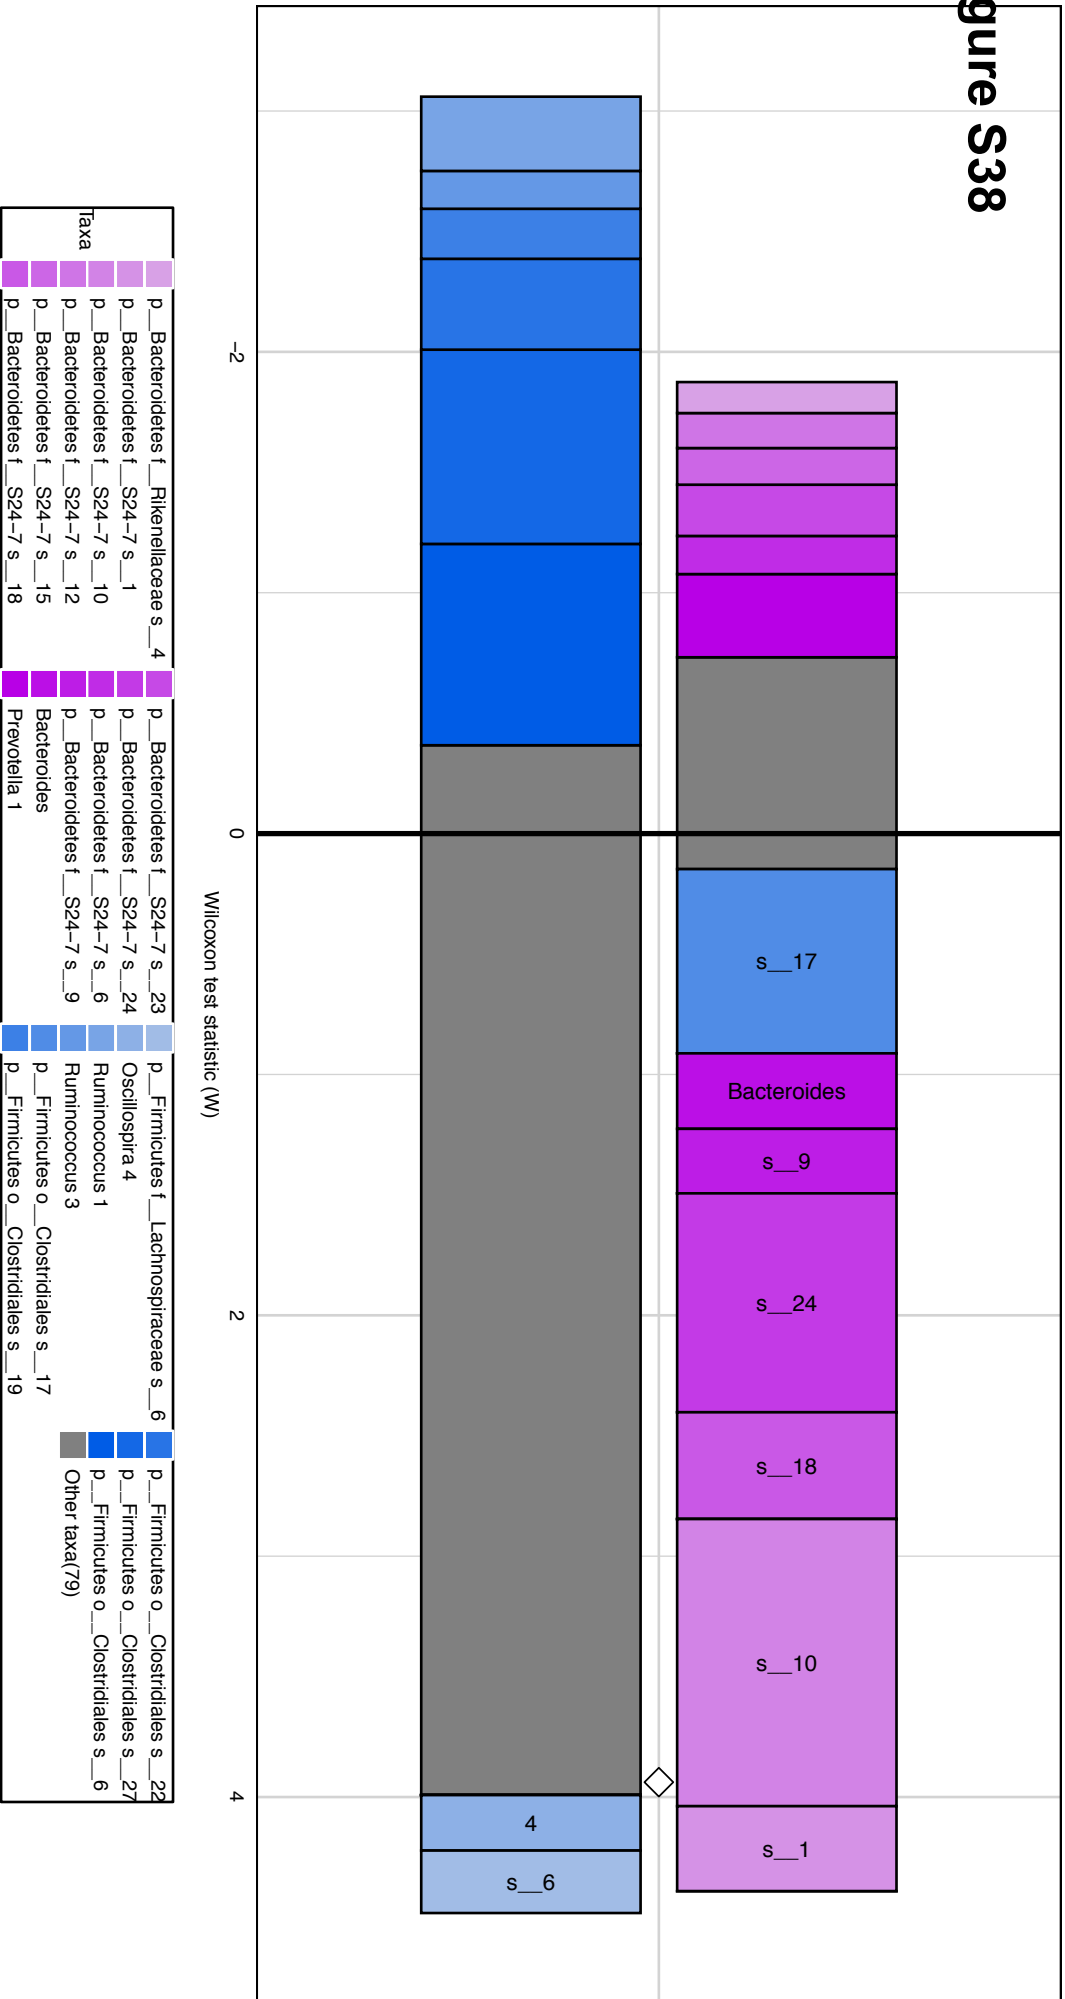

# Figure S39

ko04070

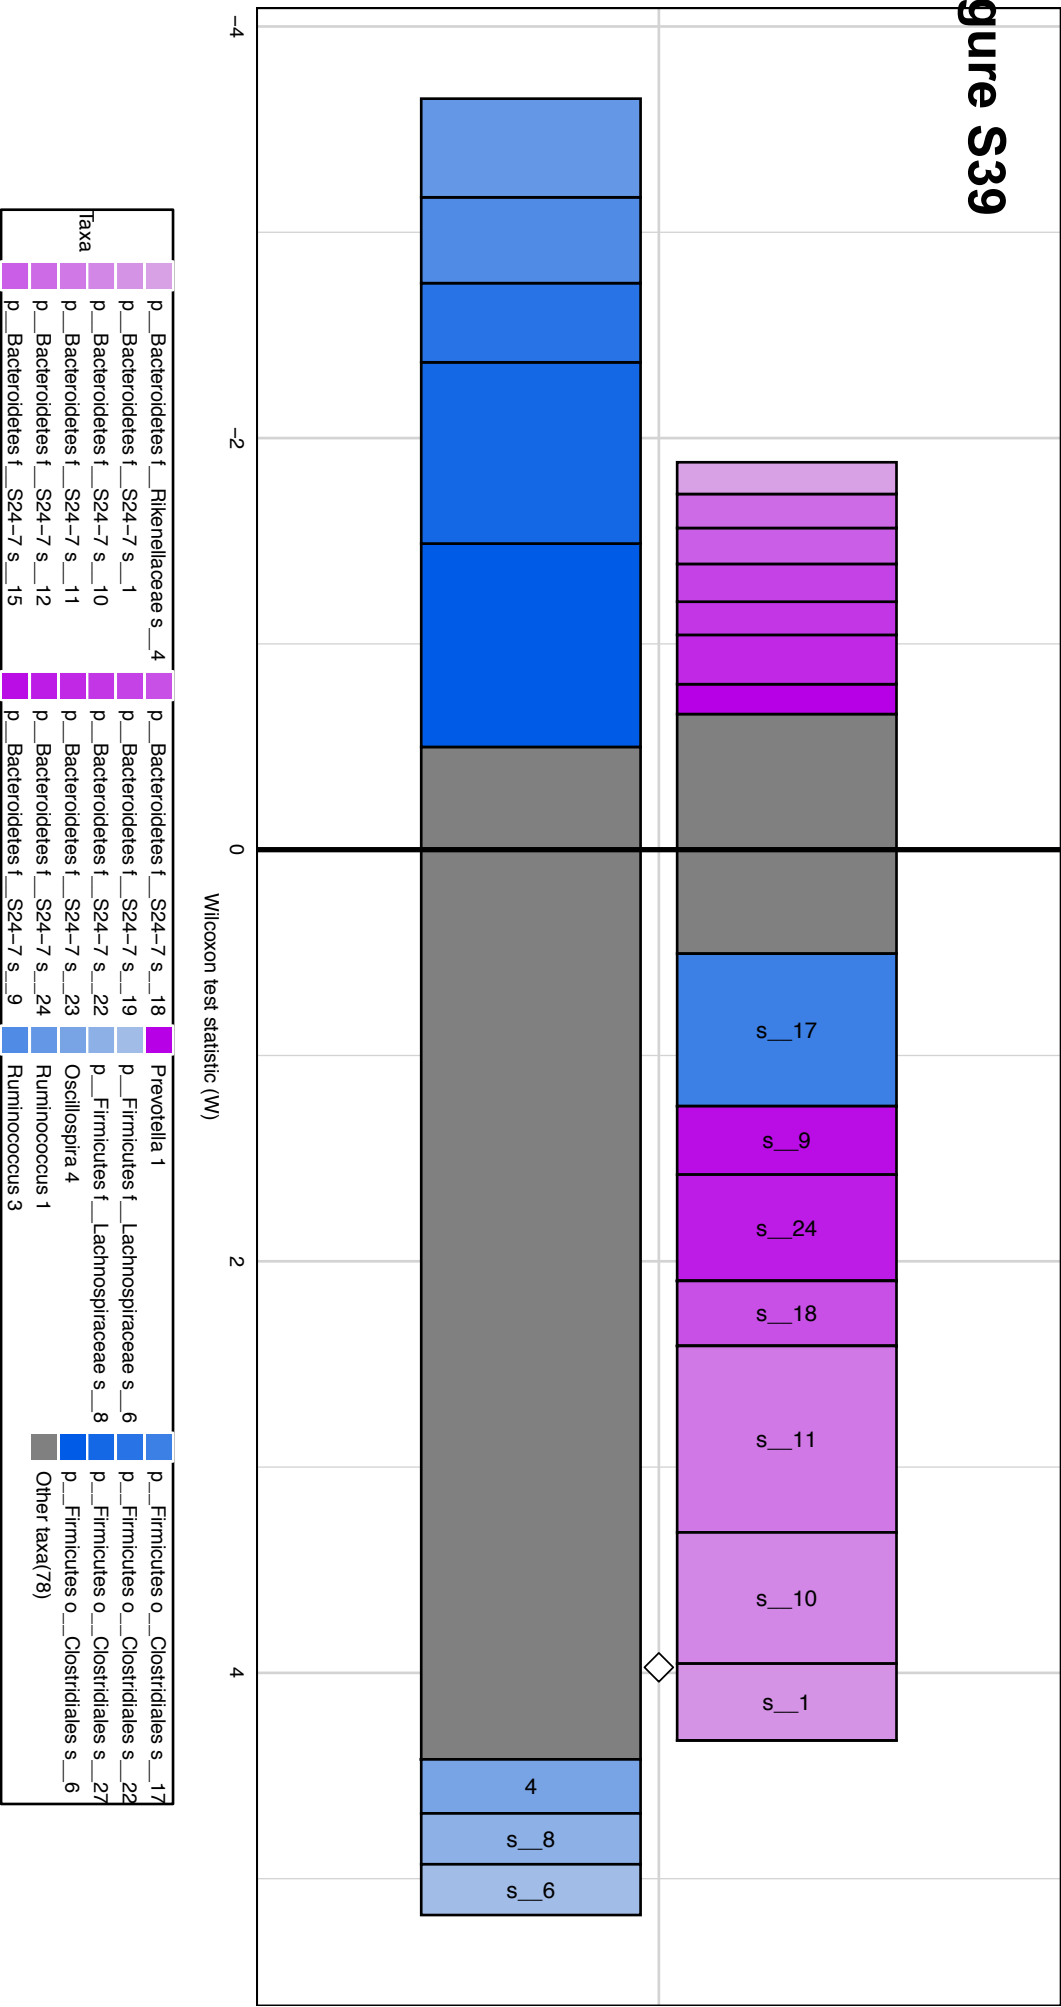

Supplement: kfaa161_supplementary_data.pdf [file kfaa161_supplementary_data.pdf]
